# Supplementary material for: Cu12-cluster-based metal–organic framework as a metastable intermediate in the formation of a layered copper phosphonate
Source: Royal Society of Chemistry journal article supplement (doi:10.1039/d4cc00550c), 2024-01-01
Supplement: d4cc00550c1.pdf [file d4cc00550c1.pdf]

## Electronic Supplementary Information

### **A Cu<sub>12</sub>-cluster-based metal-organic framework as a metastable intermediate in the formation of a layered copper phosphonate**

Qian Teng, Ran Gao, Song-Song Bao,\* Li-Min Zheng\*

State Key Laboratory of Coordination Chemistry, School of Chemistry and Chemical Engineering,  
Collaborative Innovation Center of Advanced Microstructures, Nanjing University, Nanjing 210023, P. R.  
China

\* Corresponding author. E-mail: lmzheng@nju.edu.cn, baososo@nju.edu.cn

## EXPERIMENTAL SECTION

**Materials and physical measurements.** *R*-(1-phenylethylamino)methyl-phosphonic acid (*R*-pempH<sub>2</sub>) was prepared according to methods reported in the literature.<sup>[1]</sup> All starting materials were analytical grade and obtained from commercial sources without further purification. Elemental analyses for C, H and N were carried out on a PE 240 C analyser. The FTIR spectra were recorded in the range of 400-4000 cm<sup>-1</sup> by a Bruker Tensor 27 spectrometer. Thermogravimetric analyses (TGA) were carried out using METTLER TOLEDO TGA/DSC 1 instrument from 30 to 800 °C under a nitrogen atmosphere at a heating rate of 5 °C·min<sup>-1</sup>. The powder X-ray diffraction (PXRD) patterns were collected using a Bruker D8 advance diffractometer. The circular dichroism (CD) spectra were recorded on a JASCO J-810 W spectropolarimeter at room temperature. The gas absorption and desorption isotherms were conducted by a BELSORP-Max adsorption analyzer. The UV/Vis spectra were measured on a Perkin Elmer Lambda 950 UV/VIS/NIR spectrometer using powder samples. The electrospray ionization mass spectrometry (ESI-MS) spectra were recorded using an LCQ fleet ESI-MS spectrometer (Thermo Scientific) in the positive and negative modes, and the isotopic distribution patterns of the observed species were simulated using the Xcalibur program.

**Solid photothermal experiment.** The Fotric 226s IR camera collected infrared photographs. An 808 nm light was generated through an infrared diode laser generator (MW-GX-808/5W from Changchun LASER Optoelectronics Tech Co, Ltd.), and the spot area is 1 cm<sup>2</sup>. The sample was made into 7 mm<sup>2</sup> circular slice on 2.0 × 2.0 cm<sup>2</sup> glass sheets, and the distance between the laser lamp and the sample was changed to make the spot completely coincide with the sample.

**Synthesis of [Cu<sub>24</sub>(OH)<sub>20</sub>(*R*-pempH)<sub>8</sub>(SO<sub>4</sub>)<sub>10</sub>(H<sub>2</sub>O)<sub>10.5</sub>·35H<sub>2</sub>O (1).** *R*-pempH<sub>2</sub> (11 mg, 0.05 mmol) was added in 3 mL deionized water in a 20 mL glass vial. After heating at 90 °C for 3 hours, a clear solution was obtained because of the dissolution of ligand. Then 100 μL imidazole (4 M) and 3 mL MeOH were added. After the solution was mixed uniformly, CuSO<sub>4</sub>·5H<sub>2</sub>O (75 mg, 0.29 mmol) was added and the glass vial was sealed. The mixture was placed at 90 °C for 3 hours, green octahedral block crystals of **1** were obtained. Yield: 9 mg, 37 % (based on *R*-pempH<sub>2</sub>). Element analysis (EA) calcd (%) for C<sub>72</sub>H<sub>215</sub>Cu<sub>24</sub>O<sub>129.5</sub>P<sub>8</sub>S<sub>10</sub>N<sub>8</sub> (**1**·35H<sub>2</sub>O): C, 16.14; H, 4.04; N, 2.09 %; found: C, 16.56; H, 3.93; N, 2.58 %. IR (KBr, cm<sup>-1</sup>): 3070(w), 3285(m), 2986(w), 2806(w), 2522(w), 1623(w), 1504(w), 1453(w), 1378(m), 1283(w), 1151(w), 1113(m), 999(w), 770(w), 696(m), 605(m), 552(w), 514(w), 482(w).

**Synthesis of [Cu<sub>2</sub>(OH)(*R*-pempH)(SO<sub>4</sub>)(H<sub>2</sub>O)]·0.5H<sub>2</sub>O·0.5CH<sub>3</sub>OH (2).** Compound **2** was synthesized in the same manner as compound **1**, except that the reaction time was extended to 18 hours. Yield: 13 mg, 59 % (based on *R*-pempH<sub>2</sub>). Element analysis (EA) calcd (%) for C<sub>9.5</sub>H<sub>19</sub>Cu<sub>2</sub>NO<sub>10</sub>PS: C, 22.94; H, 3.85; N, 2.82 %; found: C, 22.63; H, 3.90; N, 2.86 %. IR (KBr, cm<sup>-1</sup>): 3648(w), 3525(m), 3374(w), 2938(w), 2873(w), 2787(w), 2626(w), 2560(w), 2428(m), 2367(w), 1642(w), 1458(m), 1387(w), 1351(w), 1277(m), 1169(m), 1094(w), 1055(w), 897(w), 800(s), 783(s), 749(w), 710(s), 642(w), 611(w), 556(m), 528(w), 488(w), 448(m).

**Single crystal X-ray Crystallography.** Suitable single crystals of **1** and **2** were mounted on a loop ring, and diffraction data were collected using a Bruker D8 diffractometer equipped with TXS (Mo-Kα radiation, λ = 0.71073 Å). The collected data were integrated using the Siemens SAINT program,<sup>2</sup> and adsorption corrections were applied. The structures were solved using the intrinsic phasing method and refined on *F*<sup>2</sup> using full-matrix least-squares with the SHELXTL software package.<sup>3</sup> All the non-hydrogen atoms were refined anisotropically, while hydrogen atoms bound to carbon atoms and oxygen atoms of hydroxide were refined isotropically in the riding mode. In crystal **1**, hydrogen atoms in the water molecules were

located in a difference map, added geometrically, and isotropically refined with a riding model. In crystal 2, the lattice water molecules are severely disordered and treatable by SQUEEZE.<sup>4</sup> The total potential solvent accessible void volume and electron count are 6087 Å and 1470, respectively, corresponding to approximately 140 water molecules per unit cell (35 H<sub>2</sub>O per Cu<sub>24</sub> unit). The hydrogen atoms of the coordinating water molecules can not be found in the Fourier map, so they were not included. Disordered SO<sub>4</sub><sup>2-</sup> anions were treated accordingly, while regions of low occupancy were not refined for anisotropy. CCDC for **1** (2330623) and **2** (2330624) contain the supplementary crystallographic data for this paper. These data can be obtained free of charge from the Cambridge Crystallographic Data Centre via [www.ccdc.cam.ac.uk/data\\_request/cif](http://www.ccdc.cam.ac.uk/data_request/cif).

**Reference:**

- [1] X.-G. Liu, et al. Polymorphism in homochiral zinc phosphonates. *Inorg. Chem.*, 2008, 47, 5525–5527.
- [2] SAINT, version 8.40A, Program for Data Extraction and Reduction, Bruker Nano. Inc., 2019.
- [3] SHELXT 2014/5, Sheldrick, 2014; SHELXL 2018/3, Sheldrick, 2018.
- [4] A. L. Spek. PLATON SQUEEZE: a tool for the calculation of the disordered solvent contribution to the calculated structure factors. *Acta Cryst.* 2015, C71, 9–18.

**Table S1** Crystal data and structure refinements for **1** and **2**

| Compounds                                                                                           | 1                                                                                                                 | 2                                                                    |
|-----------------------------------------------------------------------------------------------------|-------------------------------------------------------------------------------------------------------------------|----------------------------------------------------------------------|
| Formula                                                                                             | C <sub>72</sub> H <sub>145</sub> Cu <sub>24</sub> O <sub>94.5</sub> P <sub>8</sub> S <sub>10</sub> N <sub>8</sub> | C <sub>9.5</sub> H <sub>19</sub> Cu <sub>2</sub> NO <sub>10</sub> PS |
| <i>M</i>                                                                                            | 4728.27                                                                                                           | 497.37                                                               |
| Crystal system                                                                                      | monoclinic                                                                                                        | orthorhombic                                                         |
| Space group                                                                                         | <i>C</i> 2                                                                                                        | <i>P</i> 2 <sub>1</sub> 2 <sub>1</sub> 2 <sub>1</sub>                |
| <i>a</i> (Å)                                                                                        | 32.3485(10)                                                                                                       | 7.0932(3)                                                            |
| <i>b</i> (Å)                                                                                        | 19.7547(5)                                                                                                        | 7.3733(4)                                                            |
| <i>c</i> (Å)                                                                                        | 32.5262(9)                                                                                                        | 31.2935(15)                                                          |
| $\alpha$ (°)                                                                                        | 90                                                                                                                | 90                                                                   |
| $\beta$ (°)                                                                                         | 112.6600(10)                                                                                                      | 90                                                                   |
| $\gamma$ (°)                                                                                        | 90                                                                                                                | 90                                                                   |
| <i>V</i> (Å <sup>3</sup> )                                                                          | 19180.9(9)                                                                                                        | 1636.66(14)                                                          |
| <i>Z</i>                                                                                            | 4                                                                                                                 | 4                                                                    |
| <i>D</i> <sub>c</sub> (g cm <sup>-3</sup> )                                                         | 1.637                                                                                                             | 2.018                                                                |
| $\mu$ (mm <sup>-1</sup> )                                                                           | 2.858                                                                                                             | 2.876                                                                |
| <i>F</i> (000)                                                                                      | 9460.0                                                                                                            | 1008.0                                                               |
| <i>R</i> <sub>int</sub>                                                                             | 0.0410                                                                                                            | 0.0344                                                               |
| GoF on <i>F</i> <sup>2</sup>                                                                        | 1.044                                                                                                             | 1.079                                                                |
| <i>R</i> <sub>1</sub> , <i>wR</i> <sub>2</sub> <sup>[a]</sup> [ <i>I</i> > 2 $\sigma$ ( <i>I</i> )] | 0.0452, 0.1220                                                                                                    | 0.0230, 0.0596                                                       |
| CCDC                                                                                                | 2330623                                                                                                           | 2330624                                                              |

$$R_1 = \frac{\sum ||F_o| - |F_c||}{\sum |F_o|}, \quad wR_2 = \left[ \frac{\sum w(F_o^2 - F_c^2)^2}{\sum w(F_o^2)^2} \right]^{1/2}$$

**Table S2.** Selected bond lengths [Å] and bond angles [°] of **1**.

|          |          |            |           |           |           |
|----------|----------|------------|-----------|-----------|-----------|
| Cu1-O1   | 2.167(6) | Cu9-O11    | 2.373(6)  | Cu17-O22  | 2.045(8)  |
| Cu1-O4   | 2.133(6) | Cu9-O32    | 1.951(6)  | Cu17-O39  | 1.941(7)  |
| Cu1-O25  | 1.950(6) | Cu9-O33    | 1.923(6)  | Cu17-O40  | 1.882(8)  |
| Cu1-O26  | 1.908(6) | Cu9-O61    | 1.967(6)  | Cu17-O70  | 1.996(9)  |
| Cu1-O45  | 2.253(7) | Cu10-O6    | 2.009(6)  | Cu18-O17  | 2.324(7)  |
| Cu1-O49  | 2.121(7) | Cu10-O9    | 2.233(5)  | Cu18-O22  | 1.991(7)  |
| Cu2-O1   | 1.989(6) | Cu10-O28   | 1.913(6)  | Cu18-O39  | 1.972(7)  |
| Cu2-O7   | 2.251(6) | Cu10-O34   | 1.987(5)  | Cu18-O41  | 1.887(8)  |
| Cu2-O25  | 1.979(6) | Cu10-O65   | 2.005(6)  | Cu18-O8W  | 1.999(8)  |
| Cu2-O27  | 1.887(6) | Cu11-O6    | 2.233(6)  | Cu19-O15  | 1.967(8)  |
| Cu2-O1W  | 2.007(7) | Cu11-O12   | 1.975(6)  | Cu19-O20  | 2.252(8)  |
| Cu3-O4   | 2.004(6) | Cu11-O30   | 1.900(6)  | Cu19-O37  | 1.893(9)  |
| Cu3-O7   | 2.199(6) | Cu11-O34   | 1.955(6)  | Cu19-O42  | 1.967(8)  |
| Cu3-O25  | 1.979(6) | Cu11-O67   | 1.982(11) | Cu19-O77  | 2.074(9)  |
| Cu3-O28  | 1.904(6) | Cu11-O11W  | 1.954(11) | Cu20-O15  | 2.214(8)  |
| Cu3-O2W  | 2.044(7) | Cu12-O9    | 1.953(6)  | Cu20-O23  | 1.993(8)  |
| Cu4-O2   | 2.089(6) | Cu12-O12   | 2.422(6)  | Cu20-O40  | 1.915(9)  |
| Cu4-O5   | 2.088(6) | Cu12-O33   | 1.951(6)  | Cu20-O42  | 1.941(9)  |
| Cu4-O26  | 1.896(6) | Cu12-O34   | 2.015(6)  | Cu20-O74  | 2.070(13) |
| Cu4-O29  | 1.955(6) | Cu12-O5W   | 1.989(7)  | Cu21-O20  | 1.969(8)  |
| Cu4-O64A | 2.044(7) | Cu13-O13   | 2.139(9)  | Cu21-O23  | 2.358(9)  |
| Cu5-O5   | 2.197(6) | Cu13-O16   | 2.178(7)  | Cu21-O42  | 1.997(9)  |
| Cu5-O10  | 2.015(5) | Cu13-O35   | 1.958(7)  | Cu21-O43  | 1.922(9)  |
| Cu5-O29  | 1.963(6) | Cu13-O36   | 1.893(7)  | Cu21-O9W  | 1.991(11) |
| Cu5-O30  | 1.896(6) | Cu13-O46   | 2.151(7)  | Cu22-O18  | 1.994(8)  |
| Cu5-O53  | 1.978(6) | Cu13-O50   | 2.219(7)  | Cu22-O21  | 2.209(8)  |
| Cu6-O2   | 2.328(6) | Cu14-O13   | 1.982(7)  | Cu22-O38  | 1.922(7)  |
| Cu6-O10  | 2.003(6) | Cu14-O19   | 2.237(7)  | Cu22-O44  | 1.971(7)  |
| Cu6-O29  | 1.937(6) | Cu14-O35   | 1.960(7)  | Cu22-O79  | 2.008(8)  |
| Cu6-O31  | 1.900(6) | Cu14-O37   | 1.916(9)  | Cu22-O10W | 2.508(11) |
| Cu6-O3W  | 2.006(7) | Cu14-O6W   | 2.030(9)  | Cu23-O18  | 2.297(8)  |
| Cu7-O3   | 2.004(6) | Cu15-O16   | 2.002(7)  | Cu23-O24  | 1.997(8)  |
| Cu7-O8   | 2.253(6) | Cu15-O19   | 2.237(7)  | Cu23-O41  | 1.869(8)  |
| Cu7-O27  | 1.904(6) | Cu15-O35   | 1.985(7)  | Cu23-O44  | 1.947(7)  |
| Cu7-O32  | 1.967(6) | Cu15-O38   | 1.916(7)  | Cu23-O73  | 2.027(9)  |
| Cu7-O57  | 2.028(7) | Cu15-O7W   | 2.056(8)  | Cu24-O21  | 1.966(7)  |
| Cu7-O4W  | 2.588(8) | Cu16-O14   | 2.129(8)  | Cu24-O24  | 2.369(8)  |
| Cu8-O3   | 2.298(6) | Cu16-O17   | 2.089(8)  | Cu24-O43  | 1.890(8)  |
| Cu8-O11  | 2.009(6) | Cu16-O36   | 1.883(6)  | Cu24-O44  | 1.977(7)  |
| Cu8-O31  | 1.894(6) | Cu16-O39   | 1.946(6)  | Cu24-O83  | 2.030(2)  |
| Cu8-O32  | 1.925(6) | Cu16-O85C  | 2.176(13) | Cu24-O83' | 2.070(5)  |
| Cu8-O55B | 2.022(7) | Cu16-O85'C | 2.060(2)  | P1-O1     | 1.517(6)  |
| Cu9-O8   | 1.963(6) | Cu17-O14   | 2.169(7)  | P1-O2     | 1.507(6)  |

|             |          |              |          |              |          |
|-------------|----------|--------------|----------|--------------|----------|
| P1-O3       | 1.510(6) | P4-O10       | 1.546(6) | P6-O17       | 1.502(8) |
| P2-O4       | 1.518(6) | P4-O11       | 1.515(6) | P6-O18       | 1.524(8) |
| P2-O5       | 1.517(6) | P4-O12       | 1.518(6) | P7-O19       | 1.488(8) |
| P2-O6       | 1.508(7) | P5-O13       | 1.532(8) | P7-O20       | 1.509(9) |
| P3-O7       | 1.502(6) | P5-O14       | 1.507(8) | P7-O21       | 1.527(8) |
| P3-O8       | 1.522(6) | P5-O15       | 1.526(9) | P8-O22       | 1.526(8) |
| P3-O9       | 1.534(6) | P6-O16       | 1.528(7) | P8-O23       | 1.500(8) |
| O1-Cu1-O45  | 169.1(2) | O26-Cu4-O5   | 96.8(2)  | P8-O24       | 1.495(8) |
| O4-Cu1-O1   | 92.2(2)  | O26-Cu4-O29  | 179.4(3) | O32-Cu7-O3   | 83.8(2)  |
| O4-Cu1-O45  | 87.0(2)  | O26-Cu4-O64A | 87.3(3)  | O32-Cu7-O8   | 76.6(2)  |
| O25-Cu1-O1  | 78.9(2)  | O29-Cu4-O2   | 82.7(2)  | O32-Cu7-O57  | 88.9(3)  |
| O25-Cu1-O4  | 79.1(2)  | O29-Cu4-O5   | 82.6(2)  | O32-Cu7-O4W  | 96.1(2)  |
| O25-Cu1-O45 | 90.2(2)  | O29-Cu4-O64A | 93.2(2)  | O57-Cu7-O8   | 93.8(2)  |
| O25-Cu1-O49 | 93.0(2)  | O64A-Cu4-O2  | 127.5(3) | O57-Cu7-O4W  | 84.5(2)  |
| O26-Cu1-O1  | 98.0(2)  | O64A-Cu4-O5  | 129.3(3) | O11-Cu8-O3   | 98.2(2)  |
| O26-Cu1-O4  | 97.5(3)  | O10-Cu5-O5   | 95.7(2)  | O11-Cu8-O55B | 163.9(3) |
| O26-Cu1-O25 | 175.3(2) | O29-Cu5-O5   | 79.7(2)  | O31-Cu8-O3   | 102.6(2) |
| O26-Cu1-O45 | 92.9(3)  | O29-Cu5-O10  | 79.8(2)  | O31-Cu8-O32  | 178.8(2) |
| O26-Cu1-O49 | 90.7(3)  | O29-Cu5-O53  | 88.7(2)  | O31-Cu8-O55B | 89.0(3)  |
| O49-Cu1-O1  | 92.7(2)  | O30-Cu5-O5   | 106.0(2) | O32-Cu8-O3   | 77.2(2)  |
| O49-Cu1-O4  | 169.8(3) | O30-Cu5-O10  | 93.4(3)  | O32-Cu8-O11  | 85.2(2)  |
| O49-Cu1-O45 | 86.6(3)  | O30-Cu5-O29  | 171.6(3) | O32-Cu8-O55B | 92.2(3)  |
| O1-Cu2-O7   | 97.1(2)  | O30-Cu5-O53  | 96.4(3)  | O55B-Cu8-O3  | 96.7(3)  |
| O1-Cu2-O1W  | 170.1(3) | O53-Cu5-O5   | 98.3(3)  | O8-Cu9-O11   | 94.0(2)  |
| O25-Cu2-O1  | 82.7(2)  | O53-Cu5-O10  | 160.0(3) | O8-Cu9-O61   | 163.2(3) |
| O25-Cu2-O7  | 80.1(2)  | O10-Cu6-O2   | 96.1(2)  | O32-Cu9-O8   | 84.3(2)  |
| O25-Cu2-O1W | 90.9(3)  | O10-Cu6-O3W  | 166.3(3) | O32-Cu9-O11  | 75.3(2)  |
| O27-Cu2-O1  | 92.7(3)  | O29-Cu6-O2   | 77.0(2)  | O32-Cu9-O61  | 89.2(3)  |
| O27-Cu2-O7  | 104.8(2) | O29-Cu6-O10  | 80.7(2)  | O33-Cu9-O8   | 94.2(2)  |
| O27-Cu2-O25 | 173.7(3) | O29-Cu6-O3W  | 91.6(3)  | O33-Cu9-O11  | 100.4(2) |
| O27-Cu2-O1W | 93.1(3)  | O31-Cu6-O2   | 104.7(2) | O33-Cu9-O32  | 175.3(3) |
| O1W-Cu2-O7  | 89.2(3)  | O31-Cu6-O10  | 93.6(2)  | O33-Cu9-O61  | 93.4(3)  |
| O4-Cu3-O7   | 98.8(2)  | O31-Cu6-O29  | 174.5(3) | O61-Cu9-O11  | 99.3(2)  |
| O4-Cu3-O2W  | 170.0(3) | O31-Cu6-O3W  | 93.6(3)  | O6-Cu10-O9   | 89.4(2)  |
| O25-Cu3-O4  | 81.7(3)  | O3W-Cu6-O2   | 93.2(3)  | O34-Cu10-O9  | 76.3(2)  |
| O25-Cu3-O7  | 81.4(2)  | O3-Cu7-O8    | 98.7(2)  | O34-Cu10-O65 | 92.7(2)  |
| O25-Cu3-O2W | 92.9(3)  | O3-Cu7-O57   | 163.6(3) | O28-Cu10-O6  | 93.1(3)  |
| O28-Cu3-O4  | 93.3(3)  | O3-Cu7-O4W   | 81.8(2)  | O28-Cu10-O9  | 105.2(2) |
| O28-Cu3-O7  | 101.3(2) | O8-Cu7-O4W   | 172.5(2) | O28-Cu10-O34 | 176.7(3) |
| O28-Cu3-O25 | 174.7(3) | O27-Cu7-O3   | 93.6(3)  | O28-Cu10-O65 | 90.2(3)  |
| O28-Cu3-O2W | 91.8(3)  | O27-Cu7-O8   | 99.7(2)  | O34-Cu10-O6  | 83.9(2)  |
| O2W-Cu3-O7  | 88.6(3)  | O27-Cu7-O32  | 175.0(3) | O65-Cu10-O6  | 175.5(3) |
| O2-Cu4-O5   | 102.2(2) | O27-Cu7-O57  | 94.7(3)  | O65-Cu10-O9  | 92.7(2)  |
| O26-Cu4-O2  | 97.3(3)  | O27-Cu7-O4W  | 87.7(3)  | O12-Cu11-O6  | 100.6(3) |

|               |          |                |          |               |          |
|---------------|----------|----------------|----------|---------------|----------|
| O12-Cu11-O67  | 175.6(4) | O37-Cu14-O6W   | 96.8(4)  | O15-Cu19-O77  | 170.2(4) |
| O30-Cu11-O6   | 102.1(2) | O6W-Cu14-O19   | 85.8(3)  | O37-Cu19-O15  | 92.1(4)  |
| O30-Cu11-O12  | 92.7(3)  | O16-Cu15-O19   | 96.4(3)  | O37-Cu19-O20  | 103.0(3) |
| O30-Cu11-O34  | 178.1(3) | O16-Cu15-O7W   | 170.8(3) | O37-Cu19-O42  | 175.4(4) |
| O30-Cu11-O67  | 89.3(4)  | O35-Cu15-O16   | 83.0(3)  | O37-Cu19-O77  | 94.6(4)  |
| O30-Cu11-O11W | 92.0(4)  | O35-Cu15-O19   | 79.8(3)  | O42-Cu19-O15  | 83.3(3)  |
| O34-Cu11-O6   | 79.0(2)  | O35-Cu15-O7W   | 89.5(3)  | O42-Cu19-O20  | 77.7(3)  |
| O34-Cu11-O12  | 85.6(2)  | O38-Cu15-O16   | 93.3(3)  | O42-Cu19-O77  | 89.9(4)  |
| O34-Cu11-O67  | 92.4(3)  | O38-Cu15-O19   | 102.2(3) | O77-Cu19-O20  | 91.3(3)  |
| O34-Cu11-O11W | 88.9(4)  | O38-Cu15-O35   | 176.0(3) | O23-Cu20-O15  | 97.2(3)  |
| O67-Cu11-O6   | 82.8(4)  | O38-Cu15-O7W   | 94.0(3)  | O23-Cu20-O74  | 177.6(5) |
| O11W-Cu11-O6  | 112.1(5) | O7W-Cu15-O19   | 87.3(3)  | O40-Cu20-O15  | 101.6(3) |
| O11W-Cu11-O12 | 145.2(5) | O14-Cu16-O85C  | 156.8(4) | O40-Cu20-O23  | 95.1(3)  |
| O9-Cu12-O12   | 91.9(2)  | O17-Cu16-O14   | 104.6(3) | O40-Cu20-O42  | 178.8(3) |
| O9-Cu12-O33   | 91.7(2)  | O17-Cu16-O85C  | 96.2(5)  | O40-Cu20-O74  | 83.6(4)  |
| O9-Cu12-O34   | 82.4(2)  | O36-Cu16-O14   | 96.8(3)  | O42-Cu20-O15  | 77.7(3)  |
| O9-Cu12-O5W   | 173.7(3) | O36-Cu16-O17   | 98.5(3)  | O42-Cu20-O23  | 84.0(3)  |
| O33-Cu12-O12  | 106.6(2) | O36-Cu16-O39   | 177.4(3) | O42-Cu20-O74  | 97.3(4)  |
| O33-Cu12-O34  | 174.1(2) | O36-Cu16-O85C  | 90.5(4)  | O74-Cu20-O15  | 85.0(5)  |
| O33-Cu12-O5W  | 93.2(3)  | O36-Cu16-O85'C | 89.5(6)  | O20-Cu21-O23  | 94.8(3)  |
| O34-Cu12-O12  | 73.3(2)  | O39-Cu16-O14   | 82.4(3)  | O20-Cu21-O42  | 83.5(3)  |
| O5W-Cu12-O12  | 90.6(3)  | O39-Cu16-O17   | 84.1(3)  | O20-Cu21-O9W  | 171.7(4) |
| O5W-Cu12-O34  | 92.7(3)  | O39-Cu16-O85C  | 89.4(4)  | O42-Cu21-O23  | 73.9(3)  |
| O13-Cu13-O16  | 92.0(3)  | O39-Cu16-O85'C | 88.3(6)  | O42-Cu21-O9W  | 89.2(5)  |
| O13-Cu13-O46  | 169.5(3) | O85'C-Cu16-O14 | 99.9(7)  | O43-Cu21-O20  | 92.7(4)  |
| O13-Cu13-O50  | 87.5(3)  | O85'C-Cu16-O17 | 153.0(6) | O43-Cu21-O23  | 103.5(3) |
| O16-Cu13-O50  | 171.7(3) | O22-Cu17-O14   | 97.0(3)  | O43-Cu21-O42  | 175.2(3) |
| O35-Cu13-O13  | 77.9(3)  | O39-Cu17-O14   | 81.5(3)  | O43-Cu21-O9W  | 94.7(5)  |
| O35-Cu13-O16  | 79.2(3)  | O39-Cu17-O22   | 80.4(3)  | O9W-Cu21-O23  | 86.9(5)  |
| O36-Cu13-O50  | 92.4(3)  | O39-Cu17-O70   | 87.3(3)  | O18-Cu22-O21  | 96.2(3)  |
| O46-Cu13-O16  | 92.1(3)  | O40-Cu17-O14   | 102.3(3) | O18-Cu22-O79  | 170.5(4) |
| O46-Cu13-O50  | 87.0(3)  | O40-Cu17-O22   | 94.8(3)  | O18-Cu22-O10W | 82.4(4)  |
| O35-Cu13-O46  | 93.4(3)  | O40-Cu17-O39   | 174.3(3) | O38-Cu22-O79  | 88.6(3)  |
| O35-Cu13-O50  | 92.7(3)  | O40-Cu17-O70   | 95.9(4)  | O38-Cu22-O10W | 87.9(3)  |
| O36-Cu13-O13  | 98.9(3)  | O70-Cu17-O14   | 103.0(4) | O44-Cu22-O18  | 83.3(3)  |
| O36-Cu13-O16  | 95.9(3)  | O39-Cu18-O17   | 77.5(3)  | O44-Cu22-O21  | 77.4(3)  |
| O36-Cu13-O35  | 173.9(3) | O39-Cu18-O22   | 81.0(3)  | O44-Cu22-O79  | 93.2(3)  |
| O13-Cu14-O6W  | 168.9(4) | O39-Cu18-O8W   | 91.8(3)  | O44-Cu22-O10W | 91.5(3)  |
| O35-Cu14-O13  | 81.7(3)  | O41-Cu18-O17   | 103.3(3) | O79-Cu22-O21  | 91.6(3)  |
| O35-Cu14-O19  | 80.3(3)  | O41-Cu18-O22   | 93.3(3)  | O79-Cu22-O10W | 88.9(4)  |
| O35-Cu14-O6W  | 88.0(4)  | O41-Cu18-O39   | 174.3(3) | O24-Cu23-O18  | 97.5(3)  |
| O37-Cu14-O13  | 93.3(4)  | O41-Cu18-O8W   | 93.7(3)  | O41-Cu23-O24  | 92.1(3)  |
| O37-Cu14-O19  | 102.2(3) | O8W-Cu18-O17   | 94.4(3)  | O41-Cu23-O44  | 177.5(3) |
| O37-Cu14-O35  | 174.7(3) | O22-Cu18-O8W   | 164.5(3) | O41-Cu23-O73  | 93.4(3)  |

|               |         |               |          |               |          |
|---------------|---------|---------------|----------|---------------|----------|
| O44-Cu23-O18  | 76.3(3) | O21-Cu24-O83  | 166.7(7) | O43-Cu24-O83' | 97.5(1)  |
| O44-Cu23-O24  | 86.0(3) | O21-Cu24-O83' | 166.1(1) | O44-Cu24-O24  | 75.9(3)  |
| O44-Cu23-O73  | 88.9(3) | O43-Cu24-O21  | 94.0(3)  | O44-Cu24-O83  | 90.7(5)  |
| O73-Cu23-O18  | 96.2(3) | O43-Cu24-O24  | 101.6(3) | O44-Cu24-O83' | 85.6(1)  |
| O21-Cu24-O24  | 91.6(3) | O43-Cu24-O44  | 176.2(3) | O83-Cu24-O24  | 98.4(5)  |
| O21-Cu24-O44  | 83.2(3) | O43-Cu24-O83  | 92.6(5)  | O83'-Cu24-O24 | 93.7(1)  |
| Cu2-O1-Cu1    | 94.7(2) | Cu24-O21-Cu22 | 94.9(3)  | Cu11-O34-Cu10 | 103.0(3) |
| Cu4-O2-Cu6    | 91.4(2) | Cu18-O22-Cu17 | 96.3(3)  | Cu11-O34-Cu12 | 107.8(2) |
| Cu7-O3-Cu8    | 92.5(2) | Cu20-O23-Cu21 | 93.9(3)  | Cu13-O35-Cu14 | 103.0(3) |
| Cu3-O4-Cu1    | 95.6(2) | Cu23-O24-Cu24 | 91.4(3)  | Cu13-O35-Cu15 | 102.0(3) |
| Cu4-O5-Cu5    | 92.8(2) | Cu1-O25-Cu2   | 102.2(2) | Cu14-O35-Cu15 | 108.5(3) |
| Cu10-O6-Cu11  | 93.2(2) | Cu1-O25-Cu3   | 102.6(3) | Cu16-O36-Cu13 | 123.4(4) |
| Cu3-O7-Cu2    | 91.3(2) | Cu2-O25-Cu3   | 107.1(3) | Cu19-O37-Cu14 | 122.5(4) |
| Cu9-O8-Cu7    | 93.8(2) | Cu4-O26-Cu1   | 122.9(3) | Cu15-O38-Cu22 | 120.5(4) |
| Cu12-O9-Cu10  | 95.9(2) | Cu2-O27-Cu7   | 122.3(3) | Cu16-O39-Cu18 | 107.3(3) |
| Cu6-O10-Cu5   | 96.7(2) | Cu3-O28-Cu10  | 121.6(3) | Cu17-O39-Cu16 | 104.6(3) |
| Cu8-O11-Cu9   | 90.9(2) | Cu4-O29-Cu5   | 104.7(3) | Cu17-O39-Cu18 | 100.4(3) |
| Cu11-O12-Cu12 | 93.2(2) | Cu6-O29-Cu4   | 108.9(3) | Cu17-O40-Cu20 | 121.4(4) |
| Cu14-O13-Cu13 | 96.1(3) | Cu6-O29-Cu5   | 100.6(3) | Cu23-O41-Cu18 | 122.7(4) |
| Cu16-O14-Cu17 | 91.4(3) | Cu5-O30-Cu11  | 119.8(3) | Cu19-O42-Cu21 | 103.3(4) |
| Cu19-O15-Cu20 | 94.4(3) | Cu8-O31-Cu6   | 121.0(3) | Cu20-O42-Cu19 | 103.7(4) |
| Cu15-O16-Cu13 | 94.2(3) | Cu8-O32-Cu7   | 106.3(3) | Cu20-O42-Cu21 | 108.1(4) |
| Cu16-O17-Cu18 | 91.1(3) | Cu8-O32-Cu9   | 107.8(3) | Cu24-O43-Cu21 | 122.7(4) |
| Cu22-O18-Cu23 | 93.8(3) | Cu9-O32-Cu7   | 103.8(3) | Cu22-O44-Cu24 | 102.6(3) |
| Cu15-O19-Cu14 | 91.4(3) | Cu9-O33-Cu12  | 121.4(3) | Cu23-O44-Cu22 | 106.5(3) |
| Cu21-O20-Cu19 | 94.6(3) | Cu10-O34-Cu12 | 102.2(3) | Cu23-O44-Cu24 | 106.0(3) |

Symmetry transformations used to generate equivalent atoms: A:  $-x+3/2, y-1/2, -z+2$ ; B:  $-x+3/2, y+1/2, -z+2$ ; C:  $-x+3/2, y+1/2, -z+1$ .



**Table S3** Partial bond lengths [Å] and bond angles [°] of **2**.

|             |          |              |           |             |          |
|-------------|----------|--------------|-----------|-------------|----------|
| Cu1-O1      | 1.954(3) | Cu2-O2D      | 1.933(3)  | P1-O2       | 1.508(3) |
| Cu1-O3A     | 1.960(3) | Cu2-O3E      | 2.369(3)  | P1-O3       | 1.515(3) |
| Cu1-O4      | 2.380(3) | Cu2-O5       | 1.977(3)  | S1-O4       | 1.479(3) |
| Cu1-O7B     | 2.397(3) | Cu2-O8       | 2.022(3)  | S1-O5       | 1.491(3) |
| Cu1-O8      | 1.966(3) | Cu2-O1W      | 1.950(7)  | S1-O6       | 1.461(3) |
| Cu1-O8B     | 1.975(3) | Cu2-O1W'     | 1.965(15) | S1-O7       | 1.476(3) |
| Cu2-O1      | 2.435(3) | P1-O1        | 1.518(3)  |             |          |
| O1-Cu1-O3A  | 178.5(2) | O8B-Cu1-O7B  | 90.3(1)   | O5-Cu2-O8   | 97.8(1)  |
| O1-Cu1-O4   | 88.6(2)  | O8-Cu1-O7B   | 90.5(1)   | O8-Cu2-O1   | 71.8(1)  |
| O1-Cu1-O7B  | 91.3(1)  | O8-Cu1-O8B   | 179.1(4)  | O8-Cu2-O3E  | 73.6(1)  |
| O1-Cu1-O8B  | 95.2(1)  | O2D-Cu2-O1   | 90.2(1)   | O1W-Cu2-O1  | 117.9(3) |
| O1-Cu1-O8   | 84.4(1)  | O2D-Cu2-O3E  | 93.5(1)   | O1W-Cu2-O3E | 96.8(3)  |
| O3A-Cu1-O4  | 92.8(1)  | O2D-Cu2-O5   | 177.0(2)  | O1W-Cu2-O5  | 83.5(3)  |
| O3A-Cu1-O7B | 87.2(1)  | O2D-Cu2-O8   | 83.8(1)   | O1W-Cu2-O8  | 170.3(3) |
| O3A-Cu1-O8B | 84.6(1)  | O2D-Cu2-O1W  | 95.4(3)   | O1W'-Cu2-O1 | 97.0(4)  |
| O3A-Cu1-O8  | 95.8(1)  | O2D-Cu2-O1W' | 95.3(5)   | O1W'-Cu2-O5 | 82.9(5)  |
| O4-Cu1-O7B  | 178.7(1) | O3E-Cu2-O1   | 144.6(9)  | O1W'-Cu2-O8 | 168.9(4) |
| O8-Cu1-O4   | 90.8(1)  | O5-Cu2-O1    | 87.7(1)   | Cu1-O1-Cu2  | 92.1(1)  |
| O8B-Cu1-O4  | 88.3(1)  | O5-Cu2-O3E   | 89.6(1)   | Cu1B-O3-Cu2 | 92.7(1)  |
| Cu1-O8-Cu1A | 128.3(2) | Cu1-O8-Cu2   | 105.6(2)  | Cu1A-O8-Cu2 | 103.8(1) |

Symmetry transformations used to generate equivalent atoms: A:  $x+1/2, -y+3/2, -z+1$ ; B:  $x-1/2, -y+3/2, -z+1$ ; C:  $x-1/2, -y+1/2, -z+1$ ; D:  $x+1/2, -y+1/2, -z+1$ ; E:  $x+1, y, z$ .

**Table S4** Possible molecular fragments of the reaction solutions at 1h, 2h, and 3h (positive charge scan mode, m/z 400 - 2500).

| <b>positive charge scan mode (1h)</b>                                                                   |                |                        |
|---------------------------------------------------------------------------------------------------------|----------------|------------------------|
| Possible molecular fragments                                                                            | Formula weight | The main spectral peak |
| $[\text{Cu}_3(\text{OH})_3(\text{SO}_4)(\text{H}_2\text{O})_5(\text{CH}_3\text{OH})]^+$                 | 459.8          | 459.3                  |
| $[\text{Cu}_3(\text{OH})_2(\text{pempH})(\text{SO}_4)(\text{H}_2\text{O})(\text{CH}_3\text{OH})]^+$     | 584.5          | 583.5                  |
| $[\text{Cu}_4(\text{OH})_3(\text{pempH})_2(\text{SO}_4)(\text{H}_2\text{O})_3]^+$                       | 883.69         | 883.25                 |
| $[\text{Cu}_5(\text{OH})_2(\text{pempH})(\text{SO}_4)_3(\text{H}_2\text{O})_4(\text{CH}_3\text{OH})]^+$ | 958.2          | 957.2                  |
| $[\text{Cu}_6(\text{OH})_2(\text{pempH})(\text{SO}_4)_4(\text{H}_2\text{O})]^+$                         | 1031.76        | 1031.29                |
| $[\text{Cu}_6(\text{OH})_3(\text{pempH})_2(\text{SO}_4)_3(\text{H}_2\text{O})_6]^+$                     | 1254           | 1254.35                |
| $[\text{Cu}_9(\text{OH})_6(\text{pempH})(\text{SO}_4)_5(\text{H}_2\text{O})_2]^+$                       | 1403.53        | 1403.38                |
| $[\text{Cu}_6(\text{OH})_3(\text{pempH})_4(\text{SO}_4)_2(\text{H}_2\text{O})_4]^+$                     | 1552           | 1551.4                 |
| <b>positive charge scan mode (2h)</b>                                                                   |                |                        |
| $[\text{Cu}_3(\text{OH})_2(\text{pempH})(\text{SO}_4)(\text{H}_2\text{O})(\text{CH}_3\text{OH})]^+$     | 584.5          | 583.5                  |
| $[\text{Cu}_3(\text{OH})(\text{pempH})_2(\text{SO}_4)]^+$                                               | 731.5          | 731.49                 |
| $[\text{Cu}_4(\text{OH})_3(\text{pempH})_2(\text{SO}_4)(\text{H}_2\text{O})_3]^+$                       | 883.69         | 883.25                 |
| $[\text{Cu}_5(\text{OH})_2(\text{pempH})(\text{SO}_4)_3(\text{H}_2\text{O})_4(\text{CH}_3\text{OH})]^+$ | 958.2          | 957.2                  |
| $[\text{Cu}_6(\text{OH})_2(\text{pempH})(\text{SO}_4)_4(\text{H}_2\text{O})]^+$                         | 1031.76        | 1031.29                |
| $[\text{Cu}_6(\text{OH})_3(\text{pempH})_2(\text{SO}_4)_3(\text{H}_2\text{O})_6]^+$                     | 1254           | 1254.35                |
| $[\text{Cu}_9(\text{OH})_6(\text{pempH})(\text{SO}_4)_5(\text{H}_2\text{O})_2]^+$                       | 1403.53        | 1403.38                |
| $[\text{Cu}_6(\text{OH})_3(\text{pempH})_4(\text{SO}_4)_2(\text{H}_2\text{O})_4]^+$                     | 1552           | 1551.4                 |
| <b>positive charge scan mode (3h)</b>                                                                   |                |                        |
| $[\text{Cu}_4(\text{OH})_3(\text{pempH})_2(\text{SO}_4)(\text{H}_2\text{O})_3]^+$                       | 883.69         | 883.25                 |
| $[\text{Cu}_5(\text{OH})_2(\text{pempH})(\text{SO}_4)_3(\text{H}_2\text{O})_4(\text{CH}_3\text{OH})]^+$ | 958.2          | 957.2                  |
| $[\text{Cu}_6(\text{OH})_2(\text{pempH})(\text{SO}_4)_4(\text{H}_2\text{O})]^+$                         | 1031.76        | 1031.29                |
| $[\text{Cu}_6(\text{OH})_3(\text{pempH})_2(\text{SO}_4)_3(\text{H}_2\text{O})_6]^+$                     | 1254           | 1254.35                |
| $[\text{Cu}_9(\text{OH})_6(\text{pempH})(\text{SO}_4)_5(\text{H}_2\text{O})_2]^+$                       | 1403.53        | 1403.38                |
| $[\text{Cu}_6(\text{OH})_3(\text{pempH})_4(\text{SO}_4)_2(\text{H}_2\text{O})_4]^+$                     | 1552           | 1551.4                 |

**Table S5** Possible molecular fragments of the reaction solutions at 1h, 2h, and 3h (negative charge scan mode, m/z 400 - 2500).

| <b>negative charge scan mode (1h)</b>                                                                            |                |                        |
|------------------------------------------------------------------------------------------------------------------|----------------|------------------------|
| Possible molecular fragments                                                                                     | Formula weight | The main spectral peak |
| $[\text{Cu}_3(\text{OH})_3(\text{SO}_4)_2(\text{H}_2\text{O})_3]^-$                                              | 487.84         | 487.3                  |
| $[\text{Cu}_3(\text{OH})_3(\text{SO}_4)_2(\text{H}_2\text{O})_6]^-$                                              | 540.5          | 540.2                  |
| $[\text{Cu}_3(\text{OH})(\text{SO}_4)_3(\text{H}_2\text{O})_4(\text{CH}_3\text{OH})]^-$                          | 599.95         | 600.40                 |
| $[\text{Cu}_3(\text{OH})_4(\text{pempH})(\text{SO}_4)(\text{H}_2\text{O})_8]^-$                                  | 713.05         | 713.48                 |
| $[\text{Cu}_3(\text{OH})(\text{pempH})_2(\text{SO}_4)_2]^-$                                                      | 827.5          | 827.57                 |
| $[\text{Cu}_6(\text{OH})_5(\text{pempH})_2(\text{SO}_4)_3(\text{H}_2\text{O})_3]^-$                              | 1237.42        | 1237.31                |
| $[\text{NaCu}_6(\text{OH})_4(\text{pempH})_2(\text{SO}_4)_4(\text{H}_2\text{O})_8(\text{CH}_3\text{OH})]^-$      | 1460.62        | 1459.37                |
| $[\text{Cu}_9(\text{OH})_6(\text{pempH})_3(\text{SO}_4)_5(\text{H}_2\text{O})_2]^-$                              | 1832.89        | 1831.47                |
| $[\text{Cu}_{12}(\text{OH})_4(\text{pempH})(\text{SO}_4)_{10}(\text{H}_2\text{O})(\text{CH}_3\text{OH})]^-$      | 2054.78        | 2054.51                |
| $[\text{Cu}_{11}(\text{OH})_{11}(\text{pempH})_4(\text{SO}_4)_4]^-$                                              | 2127.12        | 2127.54                |
| $[\text{Cu}_{11}(\text{OH})_6(\text{pempH})_3(\text{SO}_4)_7(\text{H}_2\text{O})_5]^-$                           | 2204.14        | 2203.55                |
| <b>negative charge scan mode (2h)</b>                                                                            |                |                        |
| $[\text{Cu}_3(\text{OH})_3(\text{SO}_4)_2(\text{H}_2\text{O})_3]^-$                                              | 487.84         | 487.3                  |
| $[\text{Cu}_3(\text{OH})_4(\text{pempH})(\text{SO}_4)(\text{H}_2\text{O})_8]^-$                                  | 713.05         | 713.48                 |
| $[\text{NaCu}_6(\text{OH})_4(\text{pempH})_2(\text{SO}_4)_4(\text{H}_2\text{O})_8(\text{CH}_3\text{OH})]^-$      | 1460.62        | 1459.37                |
| $[\text{Cu}_9(\text{OH})_6(\text{pempH})_3(\text{SO}_4)_5(\text{H}_2\text{O})_2]^-$                              | 1832.89        | 1831.47                |
| <b>negative charge scan mode (3h)</b>                                                                            |                |                        |
| $[\text{Cu}_3(\text{OH})_4(\text{pempH})(\text{SO}_4)(\text{H}_2\text{O})_8]^-$                                  | 713.05         | 713.48                 |
| $[\text{NaCu}_6(\text{OH})_4(\text{pempH})_2(\text{SO}_4)_4(\text{H}_2\text{O})_8(\text{CH}_3\text{OH})]^-$      | 1460.62        | 1459.37                |
| $[\text{Cu}_9(\text{OH})_6(\text{pempH})_3(\text{SO}_4)_5(\text{H}_2\text{O})_2]^-$                              | 1832.89        | 1831.47                |
| $\text{Cu}_{12}(\text{OH})_{11}(\text{SO}_4)_5(\text{pempH})_4(\text{H}_2\text{O})_3(\text{CH}_3\text{OH})_2]^-$ | 2404.27        | 2403.77                |

**Table S6** Some recent reports on Cu-based coordination compounds for photothermal effect.

| Compounds                                                                                                                          | Light source                        | Sample status            | Maximum temperature           | Stability  | Reference                                                  |
|------------------------------------------------------------------------------------------------------------------------------------|-------------------------------------|--------------------------|-------------------------------|------------|------------------------------------------------------------|
| <b>1</b>                                                                                                                           | 808 nm laser<br>1 W/cm <sup>2</sup> | solid                    | 49 °C<br>(5min)               | recyclable | This work                                                  |
| <b>2</b>                                                                                                                           |                                     |                          | 54 °C                         |            |                                                            |
| [Cu <sub>2</sub> (X9A) <sub>4</sub> (CH <sub>3</sub> CN) <sub>2</sub> ]                                                            | Xenon lamp<br>300 mW                | solid                    | 28 °C<br>(5min)               | -          | <i>Inorg. Chim. Acta</i> , 2021, <b>526</b> , 120531.      |
| {[Cu <sub>2</sub> (X9A)(dppm) <sub>2</sub> (CH <sub>3</sub> CN)](BF <sub>4</sub> )·(CH <sub>3</sub> CN)}                           |                                     |                          | 27 °C<br>(20min)              | -          |                                                            |
| {[Cu <sub>2</sub> (X9A) <sub>3</sub> (bpy) <sub>2</sub> ](BF <sub>4</sub> )·0.5(H <sub>2</sub> O)} <sub>2</sub>                    |                                     |                          | 32 °C<br>(20min)              | -          |                                                            |
| [Cu <sub>4</sub> (bpy) <sub>4</sub> (1-NTAA) <sub>5</sub> ](BF <sub>4</sub> ) <sub>3</sub> ·3(CH <sub>3</sub> OH)·H <sub>2</sub> O | Xenon lamp<br>300 mW                | solid                    | 40 °C<br>(15min)              | -          | <i>Inorg. Chim. Acta</i> , 2020, <b>508</b> , 119608.      |
| [Cu <sub>2</sub> (1-NTAA) <sub>4</sub> (CH <sub>3</sub> CN) <sub>2</sub> ·2(CH <sub>3</sub> CN)                                    |                                     |                          | 37 °C<br>(10min)              | -          |                                                            |
| {[Cu <sub>2</sub> (2-NTA) <sub>4</sub> (CH <sub>3</sub> CN) <sub>2</sub> ·2.5(C <sub>6</sub> H <sub>5</sub> CN)}                   |                                     |                          | 36 °C<br>(10min)              | -          |                                                            |
| <b>HKUST-1</b><br>[Cu <sub>3</sub> (BTC) <sub>2</sub> (H <sub>2</sub> O) <sub>3</sub> ]                                            | 808 nm<br>0.8 W/cm <sup>2</sup>     | 500µg/<br>mL in<br>PBS   | 35 °C<br>(20min)              | recyclable | <i>J. Hazard. Mater.</i> 2020, <b>390</b> , 122126.        |
| <b>Cu-BTC</b><br>[[Cu <sub>3</sub> (C <sub>9</sub> H <sub>3</sub> O <sub>6</sub> ) <sub>2</sub> ]                                  | 808 nm<br>1 W/cm <sup>2</sup>       | 80 µg/<br>mL in<br>PBS   | 34 °C (10<br>min)             | -          | <i>Acta Biomater.</i> 2023, <b>158</b> , 660.              |
| <b>Cu-dhba</b><br>[Cu <sub>3</sub> (dhba) <sub>2</sub> (OH) <sub>2</sub> (H <sub>2</sub> O) <sub>4</sub> ]                         | 808 nm<br>0.288 W/cm <sup>2</sup>   | solid                    | 115 °C<br>(within<br>seconds) | recyclable | <i>Cryst. Growth Des.</i> 2023, <b>23</b> , 2, 1211.       |
| <b>CuNRs</b><br>Cu-nanorods                                                                                                        | 980 nm<br>1.2 W/cm <sup>2</sup>     | dispers<br>e in<br>water | 60 °C (5min)                  | recyclable | <i>Angew. Chem. Int. Ed.</i> 2019, <b>58</b> , 9275 – 9281 |
| <b>Cu-TCPP</b><br>Cu tetra-(4-carboxyphenyl) porphyrin                                                                             | Xenon lamp                          | film                     | 120 °C (3<br>min)             | recyclable | <i>Nat. Commun.</i> 2024, <b>15</b> , 2125                 |
| <b>Cu-POM</b><br>Cu-doped polyoxometalate clusters                                                                                 | 808 nm<br>1 W/cm <sup>2</sup>       | solution                 | 50 °C (3<br>min)              | recyclable | <i>Adv. Mater.</i> 2023, <b>35</b> , 2303432               |

|                                                                                                                                          |                               |          |                  |            |                                                             |
|------------------------------------------------------------------------------------------------------------------------------------------|-------------------------------|----------|------------------|------------|-------------------------------------------------------------|
| <b>Cu-PCy JNPs</b><br>Cu-porphyrin cyanine dye nanoparticles                                                                             | 808 nm<br>1 W/cm <sup>2</sup> | solution | 56.6 °C (10 min) | recyclable | <i>Angew. Chem. Int. Ed.</i> 2024, e202404395               |
| <b>[Cu<sub>2</sub>(DNB-Cl)<sub>4</sub>(H<sub>2</sub>O)<sub>2</sub>]-2H<sub>2</sub>O</b><br>3,5-dinitro-4-chlorobenzoic acid (HDNB-Cl)    | 808 nm<br>1 W/cm <sup>2</sup> | solid    | 130.6 °C (5min)  | recyclable | <i>CrystEngComm</i> , 2022, <b>24</b> , 7493–7499           |
| <b>[Cu<sub>2</sub>(DNB-Cl)<sub>3</sub>(OH)(H<sub>2</sub>O)<sub>2</sub>]-H<sub>2</sub>O</b><br>3,5-dinitro-4-chlorobenzoic acid (HDNB-Cl) |                               |          | 114.8 °C (5min)  |            |                                                             |
| <b>[Cu<sub>2</sub>(DNB-O)(OH)<sub>2</sub>(H<sub>2</sub>O)<sub>2</sub>]</b><br>3,5-dinitro-4-hydroxybenzoic acid (HDNB-OH)                |                               |          | 110.5 °C (5min)  |            |                                                             |
| <b>Cu-THQNPs</b><br>[Cu(C <sub>14</sub> H <sub>8</sub> O <sub>6</sub> ) <sub>n</sub> ]                                                   | 808 nm<br>1 W/cm <sup>2</sup> | solution | 52.1 °C (5min)   | recyclable | <i>ACS Appl. Mater. Interfaces</i> 2018, <b>10</b> , 25203. |

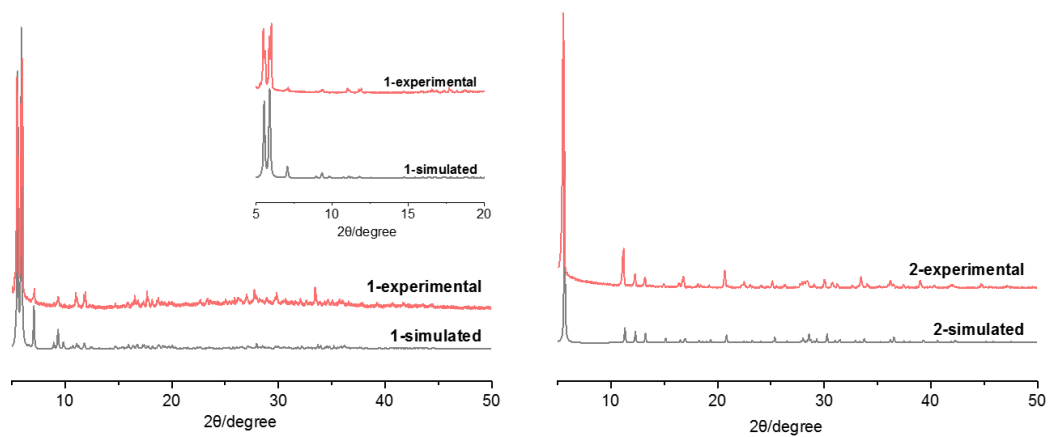

**Figure S1.** PXRD patterns of simulated from the single-crystal data of **1** and **2** (black), as-synthesized **1** and **2** (red).

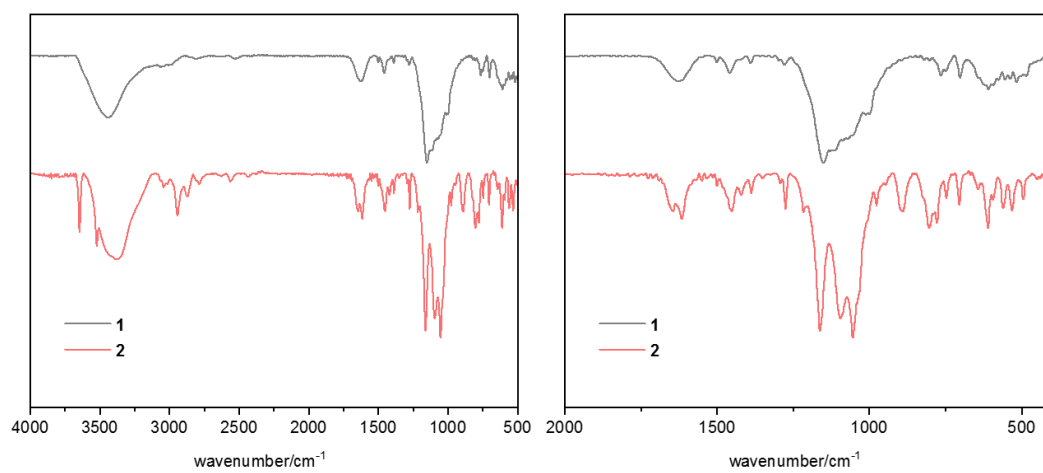

**Figure S2.** The IR spectra of compounds **1** and **2**.

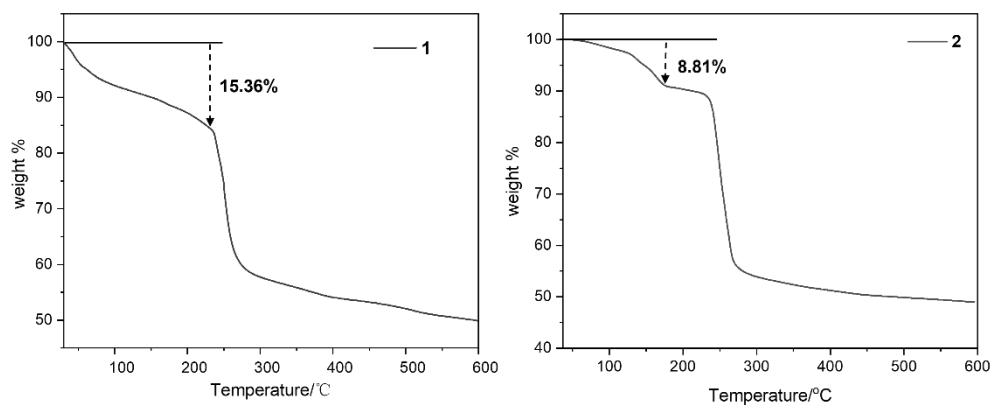

**Figure S3.** TGA curves of **1** and **2**. TGA curves of **1** and **2**. The weight loss in the ranges of 30-230 °C is 15.36% for **1**, agreeing with the release of 45.5 water molecules (35 lattice water molecules and 10.5 coordinated water molecules, calc. 15.28 %). The weight loss in the ranges of 50-175°C is 8.81% for **2**, agreeing with the release of 1.5 water molecules (0.5 lattice water molecule and 1 coordinated water molecule) and 0.5 methanol molecule (calc. 8.6%).

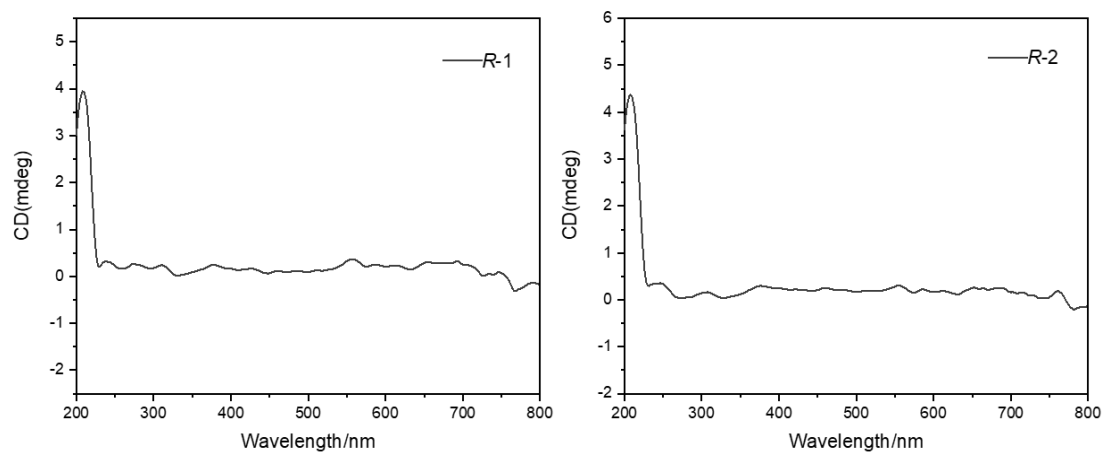

**Figure S4.** The solid state CD spectra of **R-1** and **R-2**.

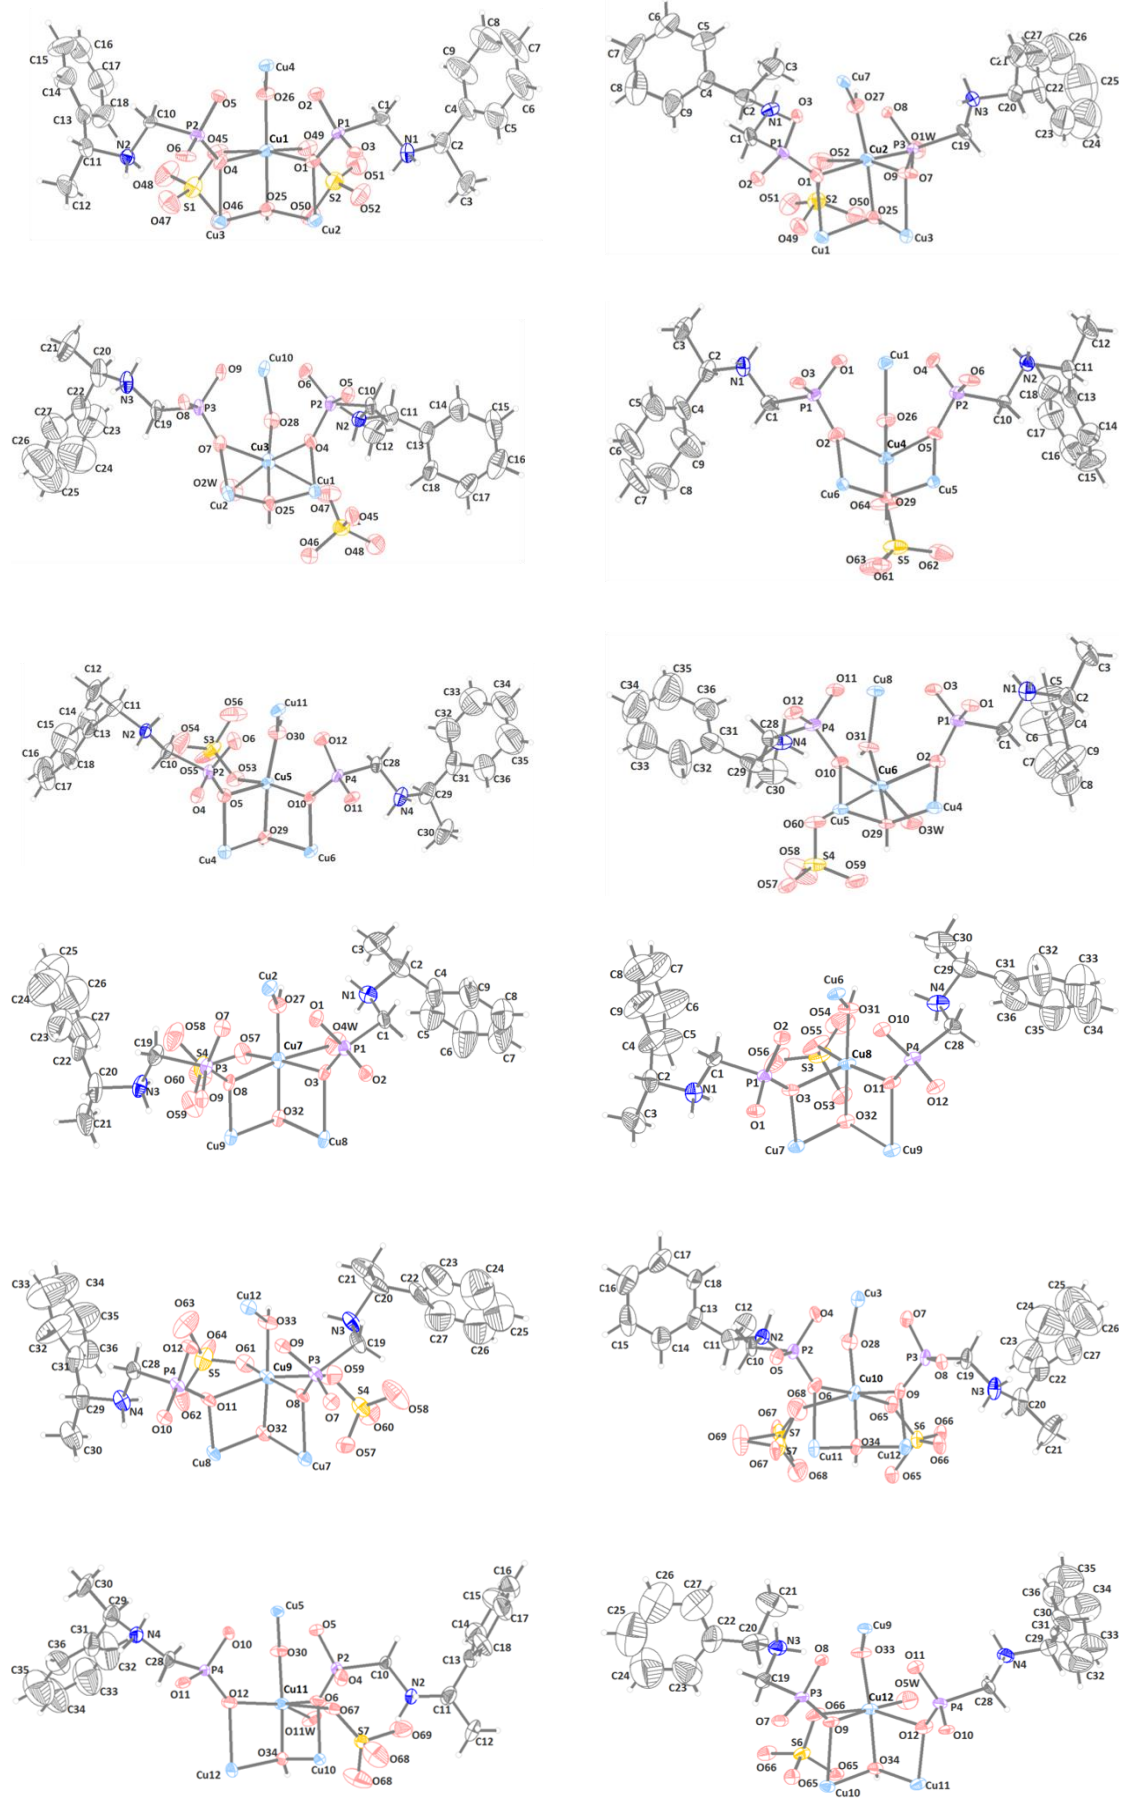

**Figure S5.** The coordination environment of Cu1 to Cu12 in Cu<sub>12</sub>-A.



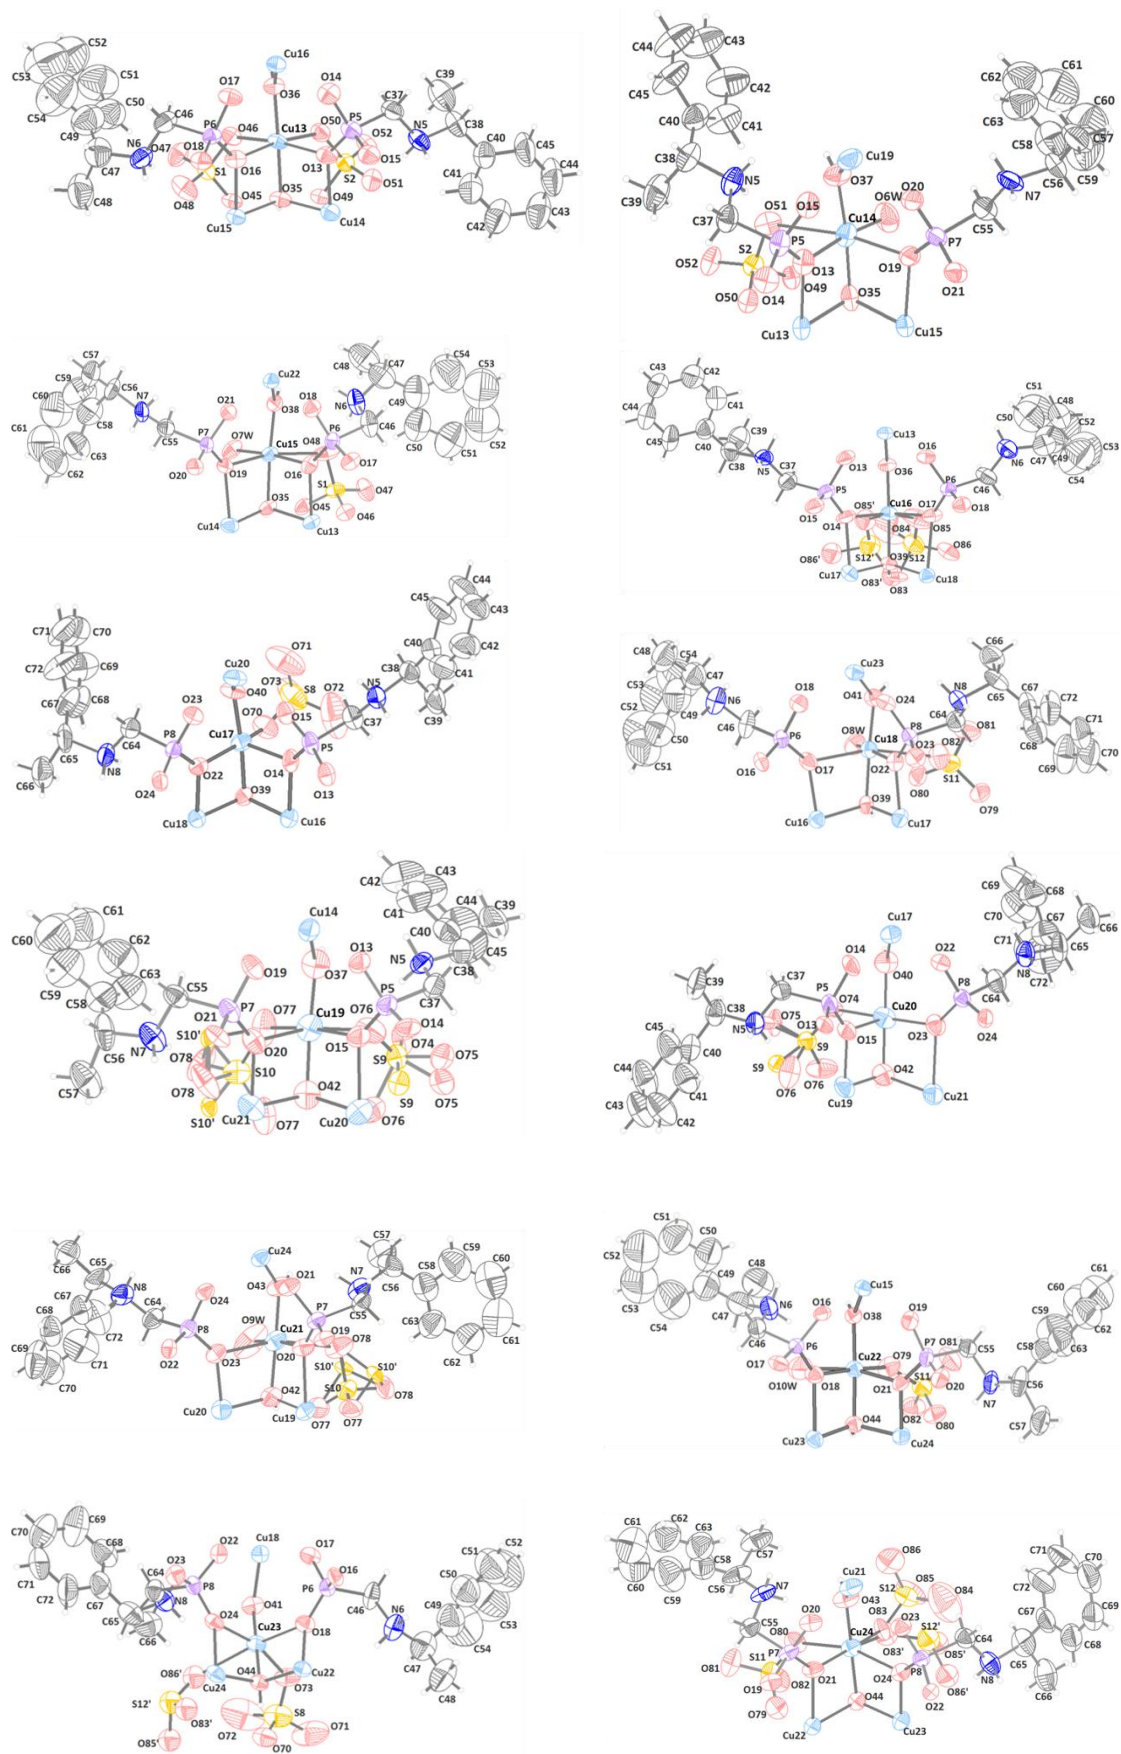

**Figure S6.** The coordination environment of Cu12 to Cu24 in Cu<sub>12</sub>-B.

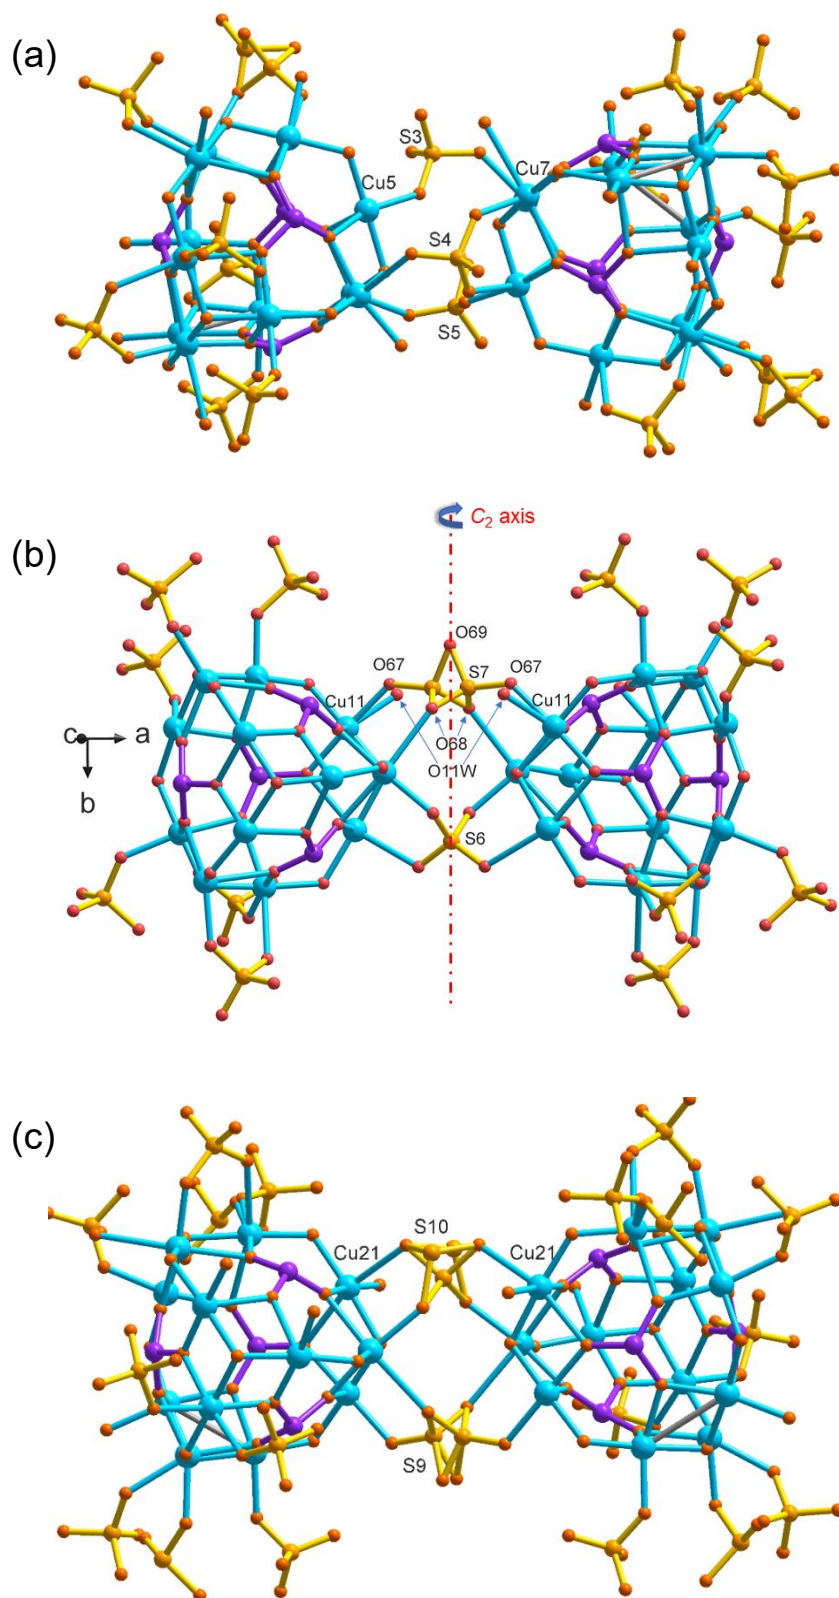

**Figure S7.** (a) Adjacent Cu<sub>12</sub>-A clusters connected by three sulfate bridges (S3, S4, S5). (b) Adjacent Cu<sub>12</sub>-A clusters connected by two sulfate bridges (S6 and S7) located at the C<sub>2</sub> axis. (c) Adjacent Cu<sub>12</sub>-B clusters connected by two sulfate bridges (S9 and S10) located at the C<sub>2</sub> axis in compound **1**.

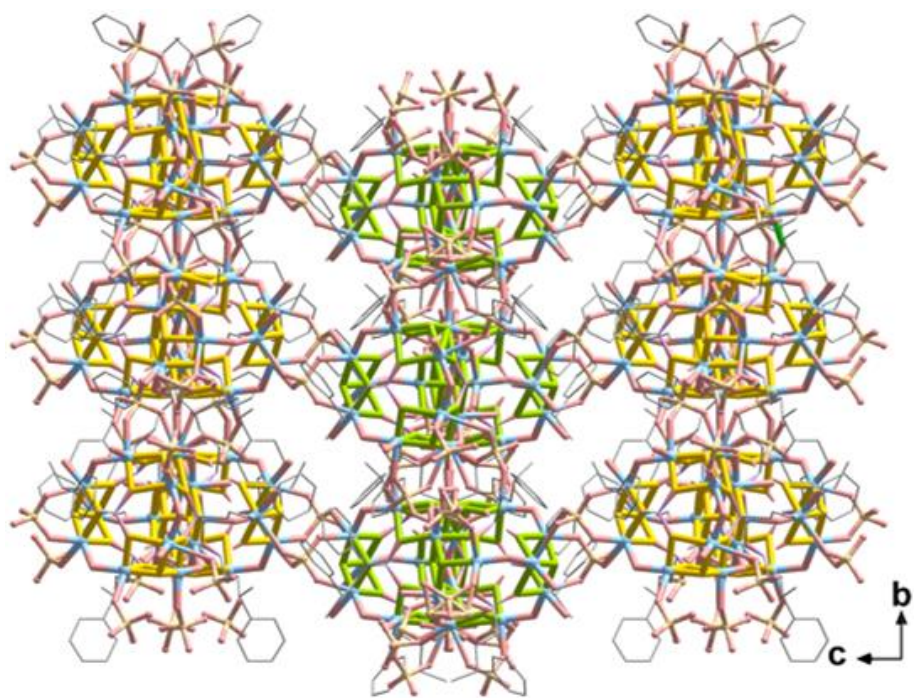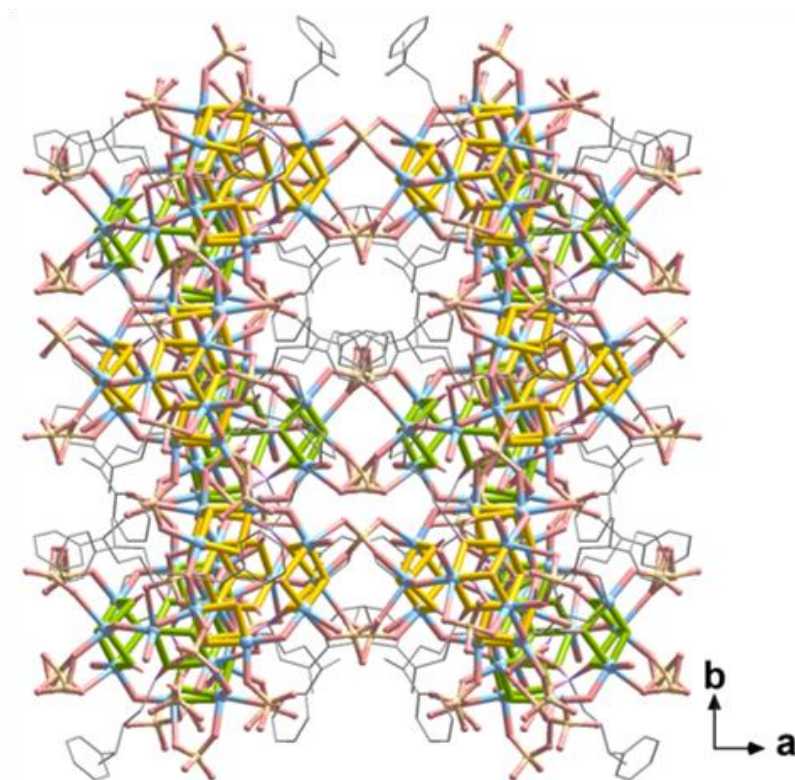

**Figure S8.** The 3D framework of **1** along *bc* plane and *ab* plane.

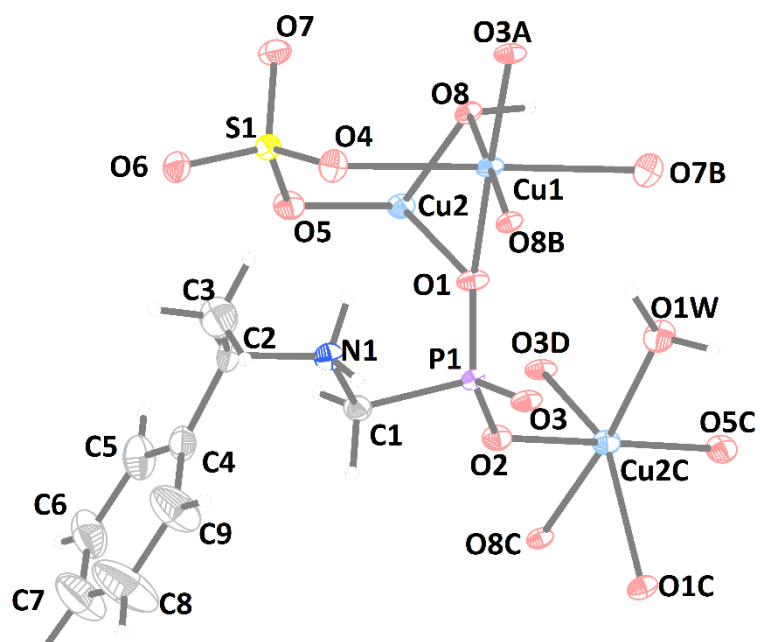

Figure S9. The asymmetric unit of **2**.

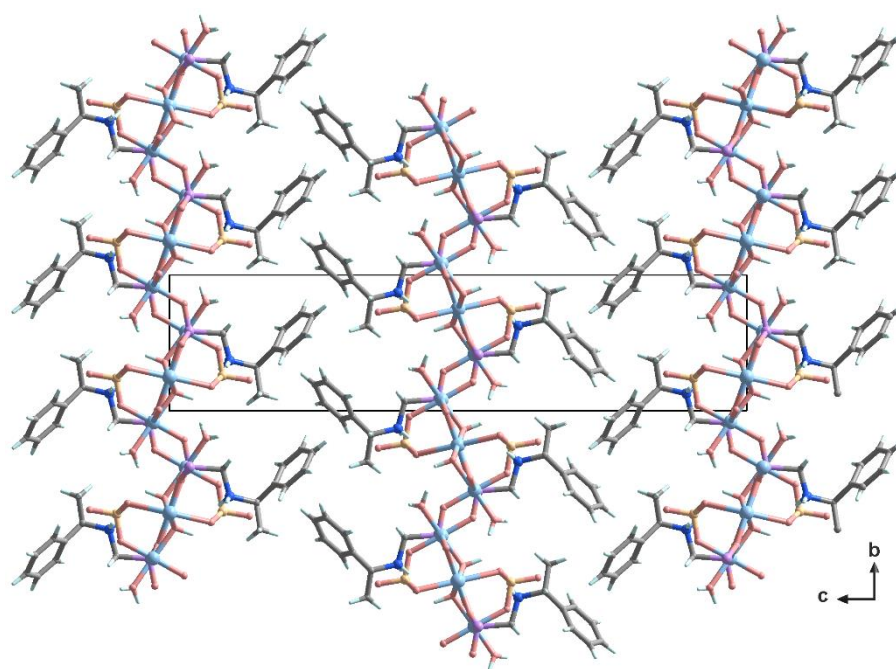

Figure S10. The 3D packing structure of **2** viewed along the *a*-axis.

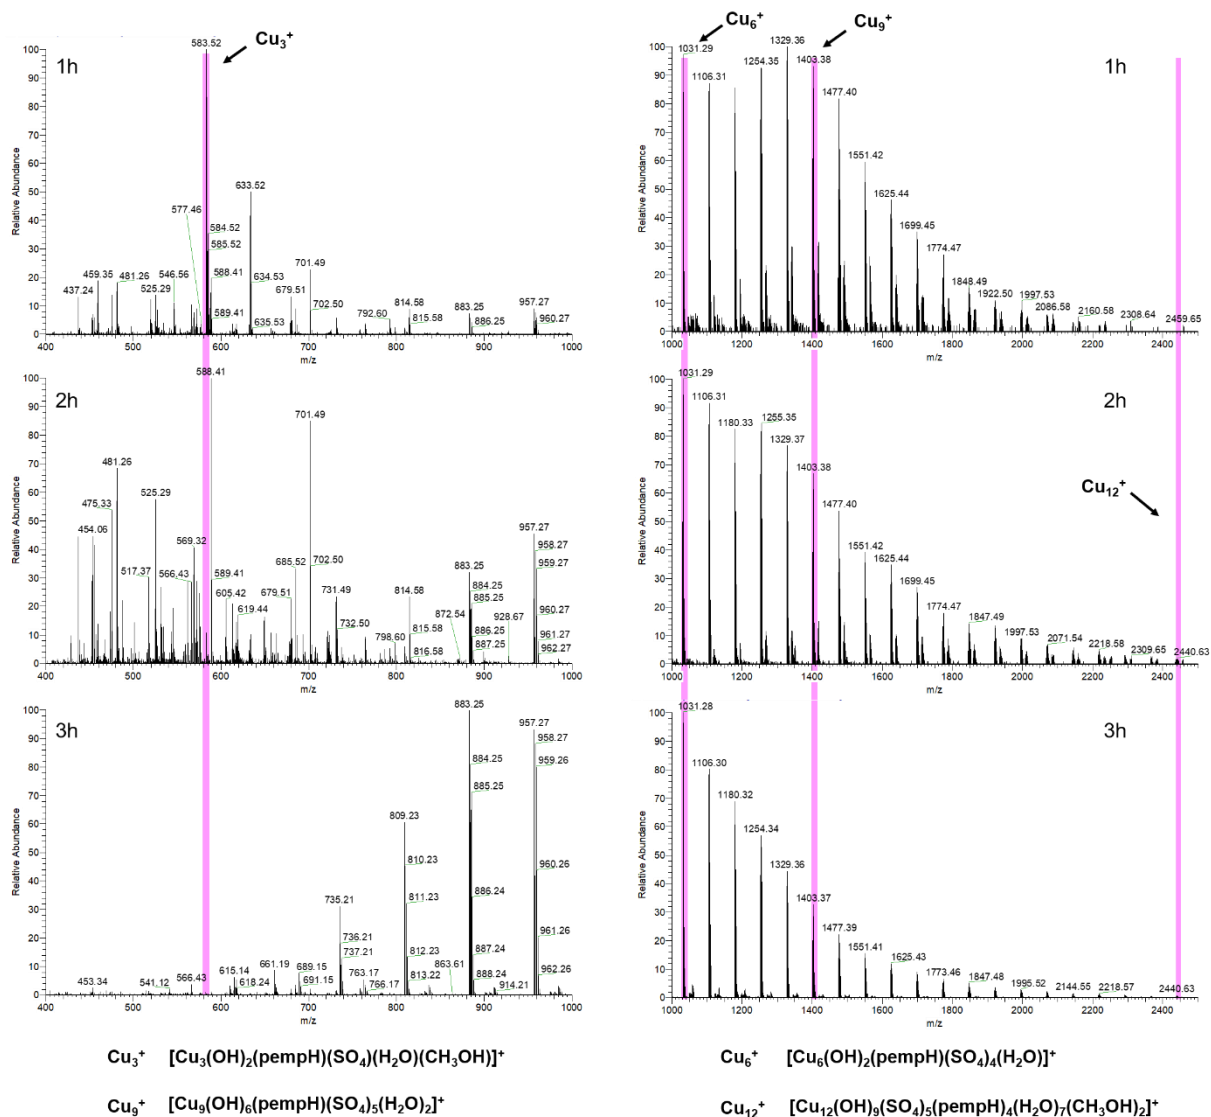

**Figure S11.** Time-dependent ESI-MS of the reaction solutions at 1h, 2h, and 3h (positive charge scan mode, m/z 400 - 2500).

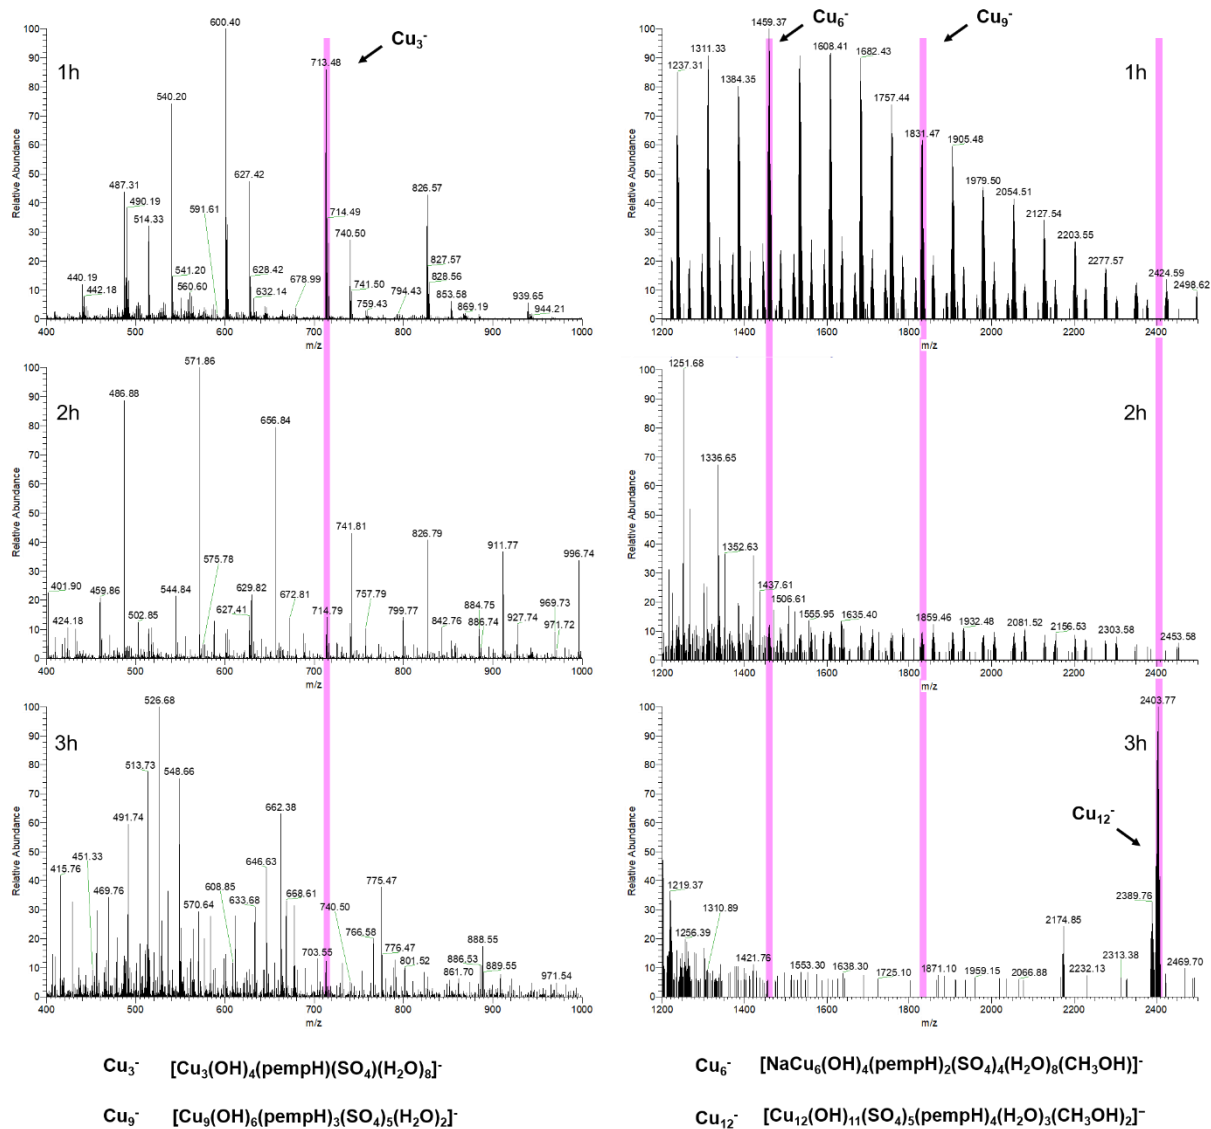

**Figure S12.** Time-dependent ESI-MS of the reaction solutions at 1h, 2h, and 3h (negative charge scan mode, m/z 400 - 2500).

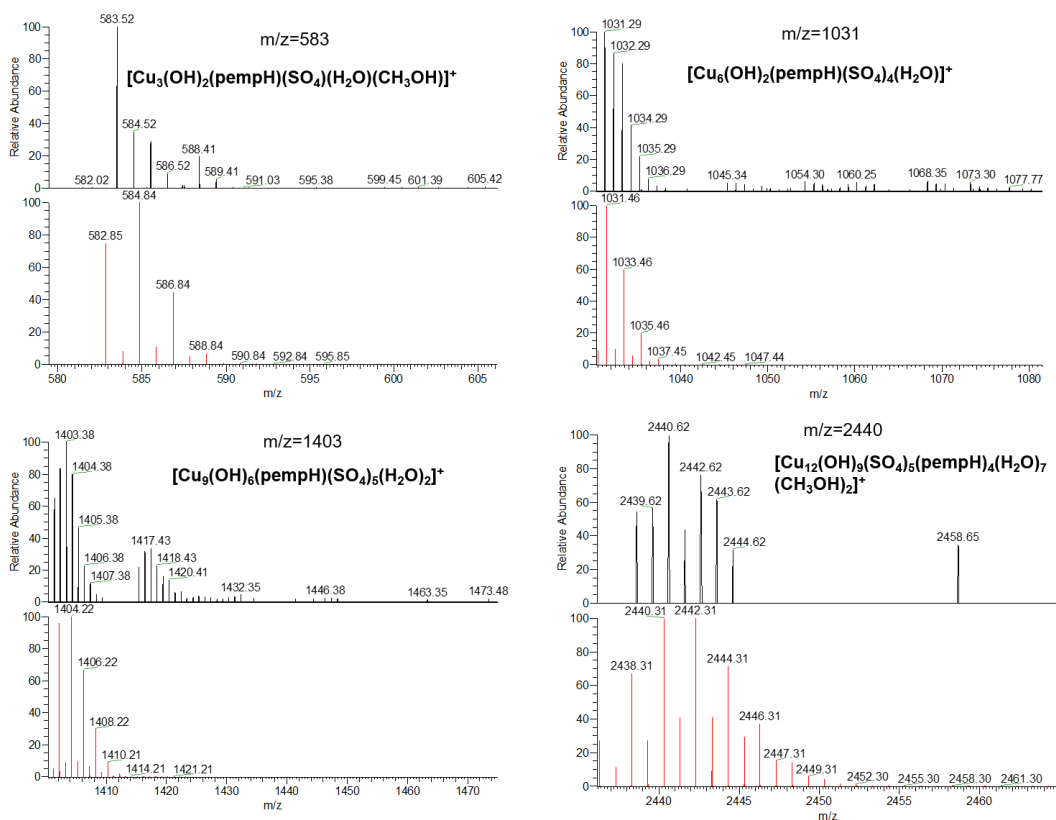

**Figure S13.** Comparison of the calculated (red) and experimental (black) isotope distribution patterns of each proposed species (positive charge scan mode).

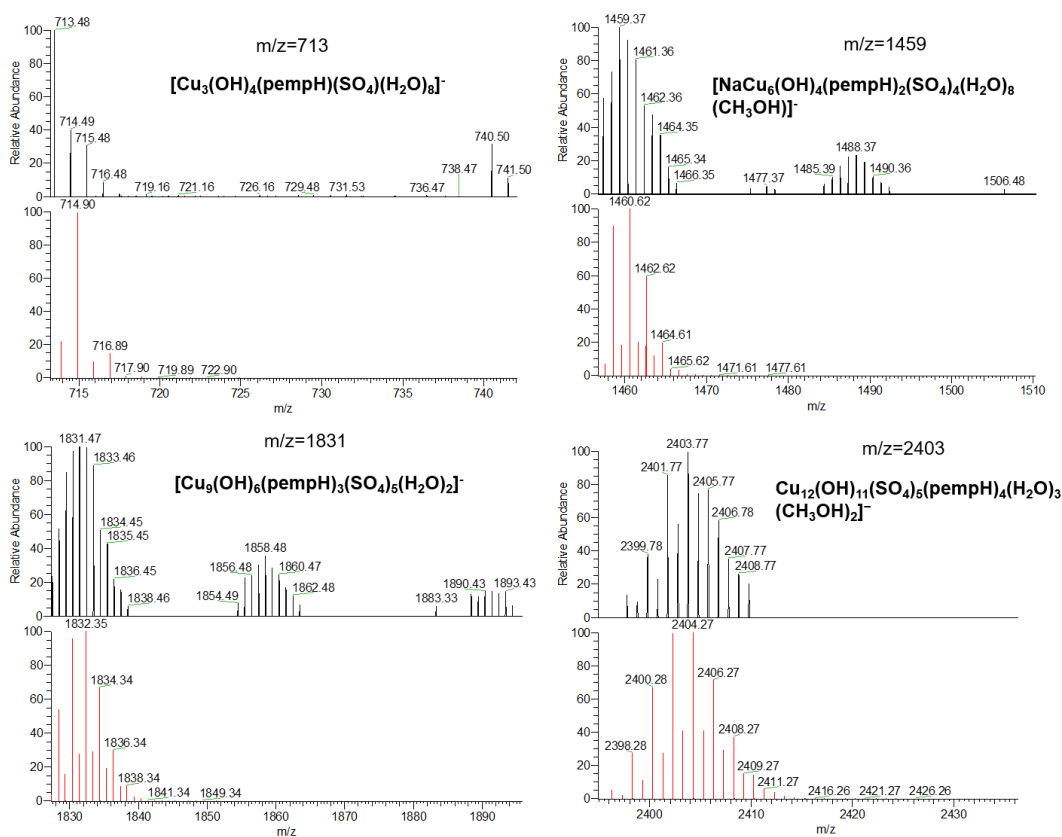

**Figure S14.** Comparison of the calculated (red) and experimental (black) isotope distribution patterns of each proposed species (negative charge scan mode).

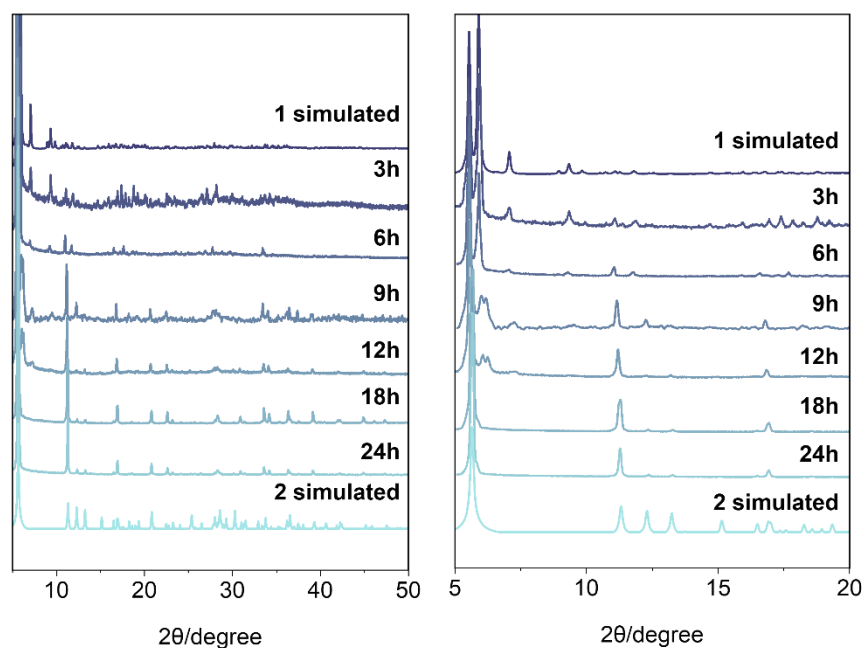

**Figure S15.** The PXRD spectra of the reaction products from **1** to **2** for different periods of time after solvothermal reactions of  $\text{CuSO}_4 \cdot 5\text{H}_2\text{O}$  and  $R\text{-pempH}_2$  at  $90^\circ\text{C}$ , when metal:ligand molar ratio was 6:1.

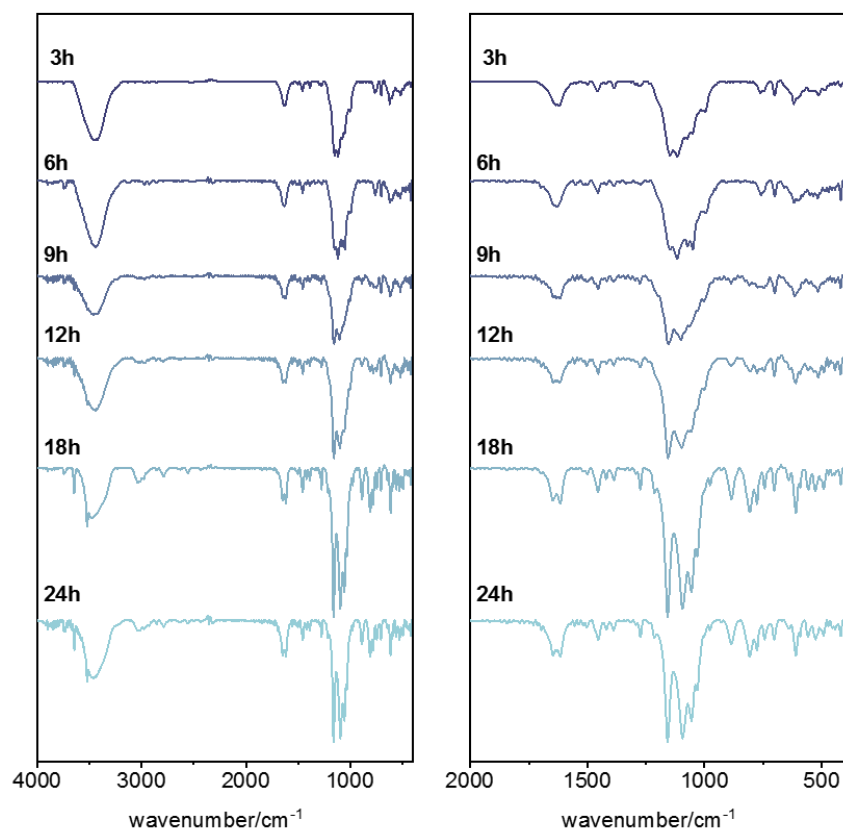

**Figure S16.** The IR spectra of the reaction products from **1** to **2** for different periods of time after solvothermal reactions of  $\text{CuSO}_4 \cdot 5\text{H}_2\text{O}$  and  $R\text{-pempH}_2$  at  $90^\circ\text{C}$ , when metal:ligand molar ratio was 6:1 (Left:  $4000\text{-}400\text{ cm}^{-1}$ , Right:  $2000\text{-}400\text{ cm}^{-1}$ ).



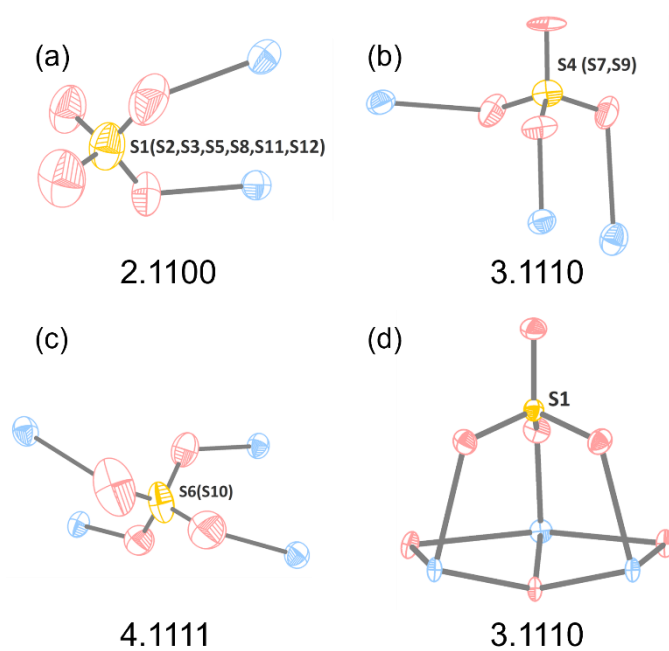

**Figure S17.** The coordination modes of the sulfato ligand of **1** (a,b,c) and **2** (d).

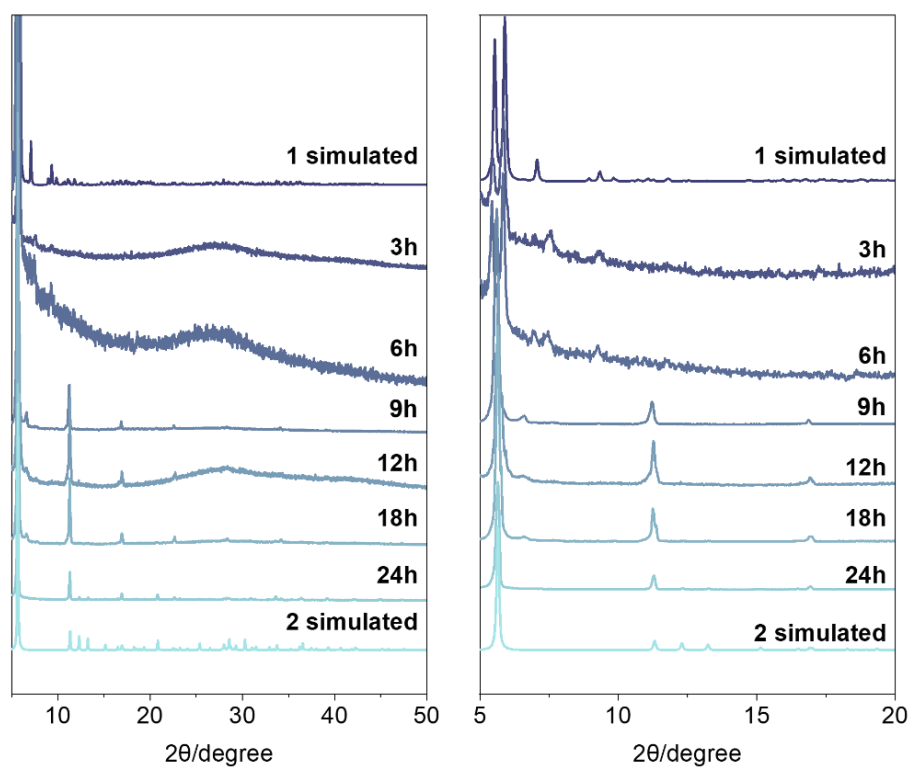

**Figure S18.** The PXRD spectra of the reaction products from **1** to **2** for different periods of time after solvothermal reactions of  $\text{CuSO}_4 \cdot 5\text{H}_2\text{O}$  and *R*-pempH<sub>2</sub> at 90°C, when metal:ligand molar ratio was 4:1.

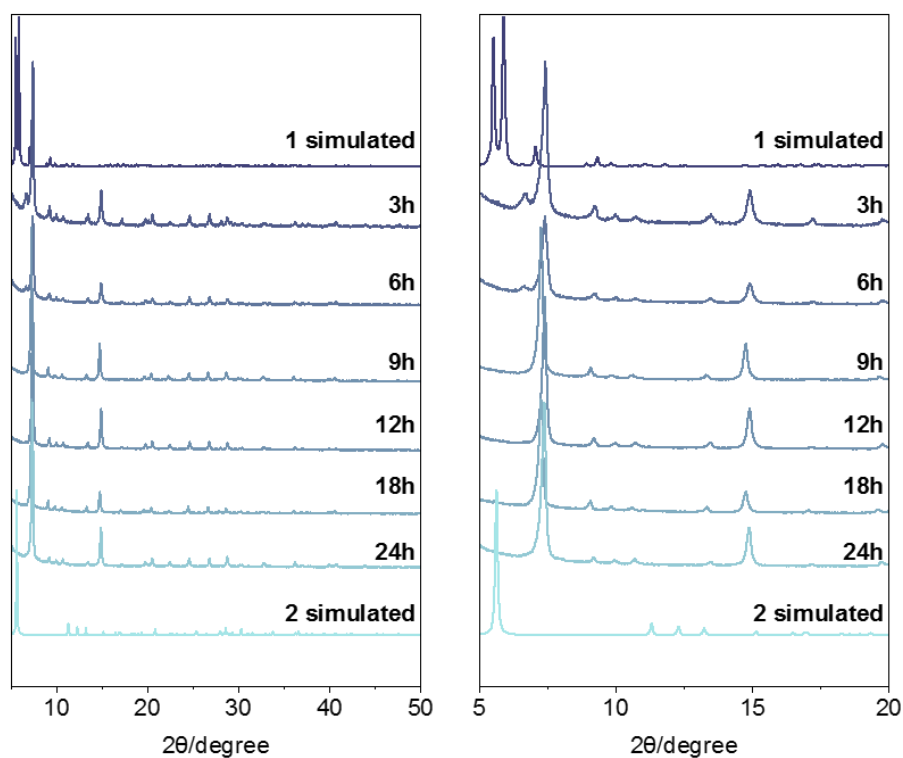

**Figure S19.** The PXR D spectra of the reaction products for different periods of time after solvothermal reactions of  $\text{CuSO}_4 \cdot 5\text{H}_2\text{O}$  and *R*-pempH<sub>2</sub> at 90°C, when metal:ligand molar ratio was 3:1.

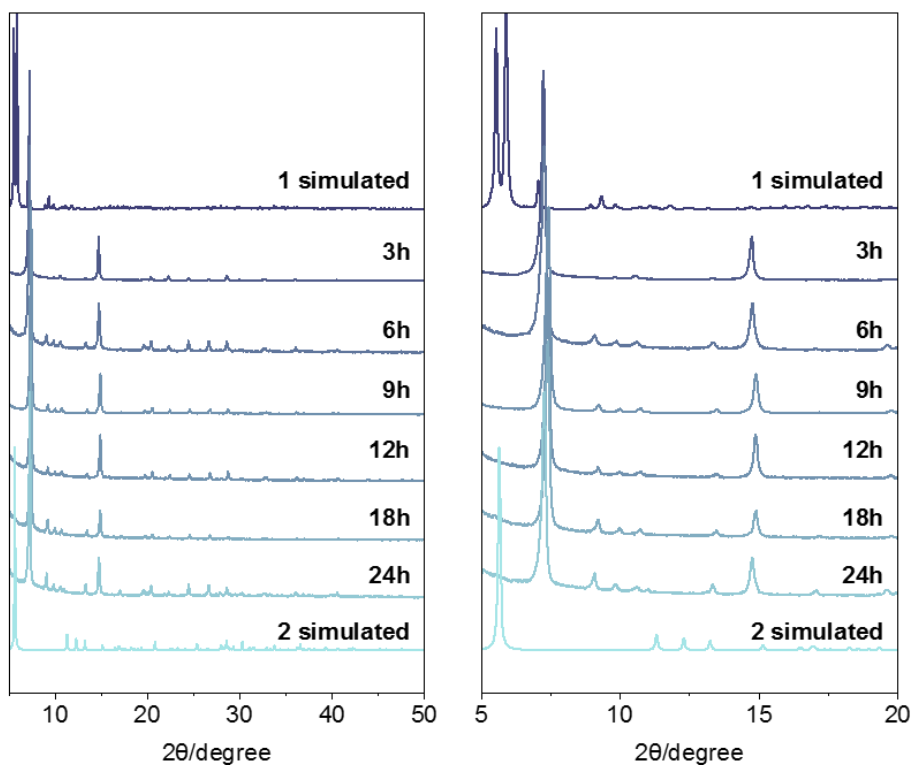

**Figure S20.** The PXR D spectra of the reaction products for different periods of time after solvothermal reactions of  $\text{CuSO}_4 \cdot 5\text{H}_2\text{O}$  and *R*-pempH<sub>2</sub> at 90°C, when metal:ligand molar ratio was 2:1.

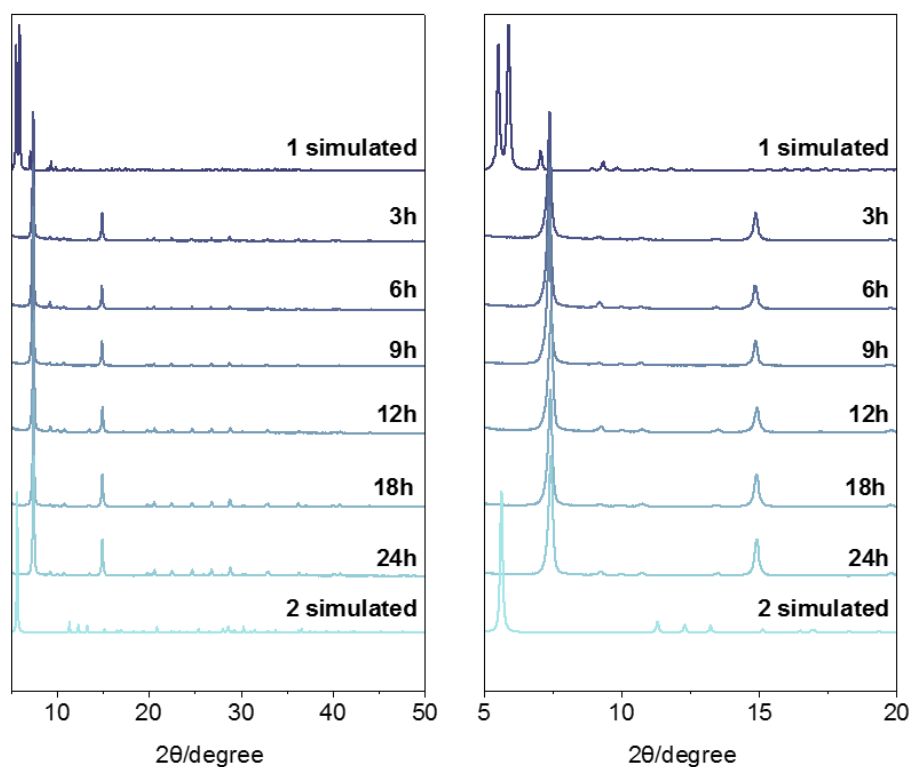

**Figure S21.** The PXR D spectra of the reaction products for different periods of time after solvothermal reactions of  $\text{CuSO}_4 \cdot 5\text{H}_2\text{O}$  and  $R\text{-pempH}_2$  at  $90^\circ\text{C}$ , when metal:ligand molar ratio was 1:1.

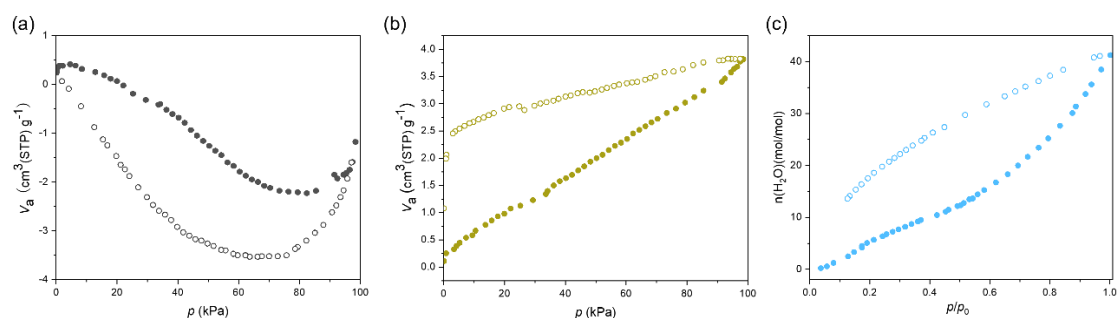

**Figure S22.** (a) The  $\text{N}_2$  adsorption (filled) and desorption (open) isotherms from 0 to 100 kPa at 77K for compound **1**; (b) the  $\text{CO}_2$  adsorption (filled) and desorption (open) isotherms from 0 to 100 kPa at 195K for compound **1**; (c) water adsorption (filled) and desorption (open) isotherms at 298 K for compound **1**.

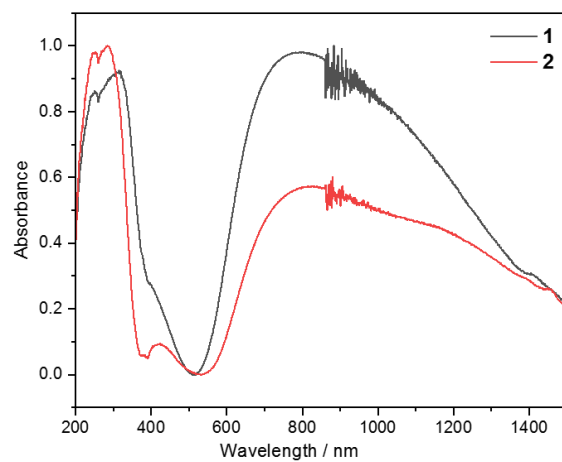

**Figure S23.** The solid state UV-vis spectra of **1** and **2**.

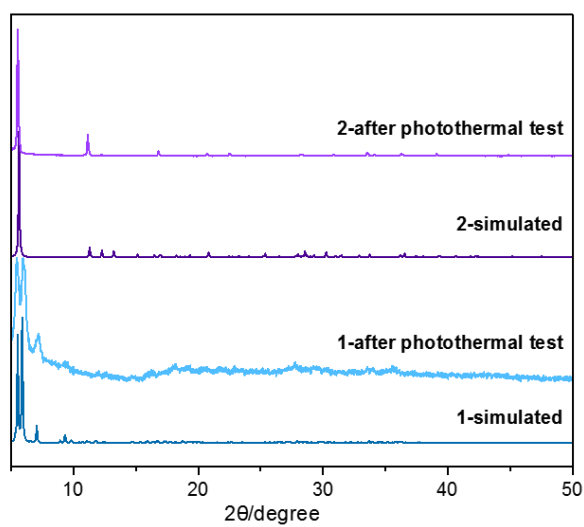

**Figure S24.** PXRD patterns of **1** and **2** after photothermal testing. The simulated patterns of **1** and **2** are given for comparison.
